## **Divergent DNA methylation signatures underlying X chromosome regulation in marsupials and eutherians**

Devika Singh<sup>1</sup>, Dan Sun<sup>1</sup>, Andrew G. King<sup>2</sup>, David E. Alquezar-Planas<sup>2</sup>, Rebecca N. Johnson<sup>2,3</sup>, David Alvarez-Ponce<sup>4,\*</sup>, and Soojin V. Yi<sup>1,\*</sup>

<sup>1</sup>School of Biological Sciences, Georgia Institute of Technology, Atlanta, Georgia, USA;

<sup>2</sup>Australian Museum Research Institute, Australian Museum, Sydney, New South Wales, Australia;

<sup>3</sup>National Museum of Natural History, Smithsonian Institution, Washington, DC, USA;

<sup>4</sup>Department of Biology, University of Nevada Reno, Reno, Nevada, USA.

\*Corresponding Authors:

David Alvarez-Ponce

Department of Biology

University of Nevada, Reno, 1664 N. Virginia Street, Reno, NV 89557

[dap@unr.edu](mailto:dap@unr.edu)

775-682-5735

Soojin V. Yi

School of Biological Sciences

Georgia Institute of Technology, 950 Atlantic Drive, Atlanta, GA 30332.

[soojin.yi@biology.gatech.edu](mailto:soojin.yi@biology.gatech.edu)

404-385-6084

## Abstract

1  
2 The phenomenon of X chromosome inactivation (XCI) mediated by sex-specific differences in  
3 DNA methylation is well characterized in eutherian mammals. Although XCI is shared between  
4 eutherians and marsupials, the role of marsupial DNA methylation in this process remains  
5 contested. Here we examine genome-wide signatures of DNA methylation from methylation maps  
6 across five tissues from a male and female koala (*Phascolarctos cinereus*) and present the first  
7 whole genome, multi-tissue marsupial “methyloome atlas.” Using these novel data, we elucidate  
8 divergent versus common features of marsupial and eutherian DNA methylation and XCI. First,  
9 tissue-specific differential DNA methylation in marsupials primarily occurs in gene bodies.  
10 Second, the marsupial X chromosome is significantly globally less methylated (hypomethylated)  
11 in females compared to males. We show that this pattern is also observed in eutherian X  
12 chromosomes. Third, on average, promoter DNA methylation shows little difference between male  
13 and female koala X chromosomes, a pattern distinct from that of eutherians. Fourth, the sex-  
14 specific DNA methylation landscape upstream of *Rsx*, the primary *lncRNA* associated with  
15 marsupial X chromosome inactivation, is consistent with the epigenetic regulation of female- (and  
16 presumably inactive X chromosome-) specific expression. Finally, we utilize the prominent female  
17 X chromosome hypomethylation and classify 98 previously unplaced scaffolds as X-linked,  
18 contributing an additional 14.6 Mb (21.5 %) to genomic data annotated as the koala X  
19 chromosome. Our work demonstrates evolutionarily divergent pathways leading to the  
20 functionally conserved pattern of X chromosome inactivation in two deep branches of mammals.

21

22

23 **Keywords:** X chromosome inactivation, marsupial, DNA methylation, dosage compensation,  
24 RSX, koala, whole genome bisulfite sequencing (WGBS)

25

26

27

28

29

30

31

32

33

## Introduction

34  
35 X chromosome inactivation (XCI) is an iconic example of sex chromosome regulation in which  
36 one of the two X chromosomes in females is silenced, a mechanism thought to adjust the  
37 expression levels of X-linked genes (Lyon 1961). Although XCI has been observed in both  
38 eutherian and marsupial mammals (Shevchenko, et al. 2013), there are several notable differences  
39 in XCI between the two lineages. First, in eutherians, the transcription of *Xist* RNA exclusively  
40 from the inactive X chromosome is essential for the X chromosome inactivation process (Brown,  
41 et al. 1992; Heard, et al. 1997; Plath, et al. 2002). However, the *Xist* locus is not present in  
42 marsupials (Duret, et al. 2006; Ng, et al. 2007). Instead, another *lncRNA* gene, *Rsx*, is associated  
43 with the marsupial X chromosome inactivation (Grant, et al. 2012). Second, marsupials  
44 demonstrate imprinted XCI by selectively silencing the paternal X chromosome (Sharman 1971;  
45 Wang, et al. 2014). In contrast, XCI in eutherians occurs randomly between the maternally and  
46 paternally derived X chromosomes, although paternal XCI has been observed during early  
47 development in rodents (Huynh and Lee 2003; Okamoto, et al. 2004). Third, in eutherians, XCI  
48 involves the exclusion of active histone marks and the recruitment of repressive histone marks on  
49 the inactive X chromosome (Heard 2005). In comparison, the inactive marsupial X chromosome,  
50 while depleted of the active histone marks, shows variable enrichment patterns of repressive  
51 histone marks (Koina, et al. 2009; Wang, et al. 2014). Specifically, out of five repressive marks  
52 examined in two marsupial studies, H3K9me3, H4K20me3, and HP1 $\alpha$  were enriched (Koina, et  
53 al. 2009) while H3K27me3 and H3K9me2 (Rens, et al. 2010) were not enriched on the inactive X  
54 chromosome. By contrast, all these marks are enriched on the inactive X in eutherians. These  
55 differences indicate complex evolutionary pathways leading to the parallel patterns of XCI in the  
56 two mammalian lineages and that novel insights into the mechanism of XCI can be gained from  
57 comparative studies.

58         Given that the patterns of repressive histone marks are diverged between eutherian and  
59 marsupial X chromosome inactivation, it is of interest to examine DNA methylation marks. In  
60 eutherians, active and inactive X chromosomes clearly exhibit differential DNA methylation  
61 (Hellman and Chess 2007; Keown, et al. 2017; Sun, et al. 2019). Specifically, the inactive X  
62 chromosome shows increased DNA methylation of promoters and decreased DNA methylation  
63 across gene bodies and intergenic regions compared to the active X chromosome. Because  
64 promoters account for a relatively small portion of all genomic regions, collectively these DNA

65 methylation patterns result in a global reduction of methylation (hypomethylation) of the inactive  
66 X chromosome in eutherians (Sun, et al. 2019). It remains unclear whether marsupial X  
67 chromosomes undergo similar differential DNA methylation. Interestingly, marsupial genomes  
68 harbor an additional copy of *DNMT1*, the gene encoding the DNA methyltransferase responsible  
69 for DNA methylation maintenance (Leonhardt, et al. 1992; Goll and Bestor 2005), through gene  
70 duplication (Alvarez-Ponce, et al. 2018), which could lead to functional divergence between the  
71 mammalian lineages. Several previous studies found little difference in DNA methylation between  
72 active and inactive marsupial X chromosomes (Piper, et al. 1993; Loebel and Johnston 1996;  
73 Wang, et al. 2014). These studies generally focused on promoter CpG islands. DNA methylation  
74 differences between the active and inactive X chromosomes, however, is a chromosome-wide  
75 phenomenon where the patterns differ depending on the nature of genomic regions (e.g. promoter,  
76 gene body, or intergenic regions) (Hellman and Chess 2007; Keown, et al. 2017; Sun, et al. 2019).  
77 Therefore, a comprehensive and unbiased investigation is necessary to understand the role of DNA  
78 methylation on X chromosome inactivation in marsupials.

79 The modern koala (*Phascolarctos cinereus*) is an Australian marsupial well-known for its  
80 unique biology and life history. This marsupial is the sole surviving member of the family  
81 Phascolarctidae following the loss of the Late Pleistocene giant koala (*P. stirtoni*) (Price 2008;  
82 Black, et al. 2014). The recently completed koala genome assembly (Johnson, et al. 2018) offers  
83 an opportunity to investigate the relationship between DNA methylation epigenetic modifications  
84 and regulation of gene expression on the sex chromosome in a marsupial in detail. A previous  
85 study characterized DNA methylation across the opossum X chromosome using reduced  
86 representation bisulfite sequencing (Waters, et al. 2018), a method that enriches for  
87 hypomethylated regions and generally over-represents promoters and CpG islands (Sun, et al.  
88 2015). To extend the survey of DNA methylation to another marsupial species across all genomic  
89 regions independent of their CpG contents, here we generated unbiased, nucleotide-resolution  
90 genomic DNA methylation maps of diverse tissues from a male and a female koala using whole  
91 genome bisulfite sequencing.

92 Our data provide the first multi-tissue, whole genome methylome resource of any  
93 marsupial with information on tissue-specific variation of DNA methylation. Utilizing these data,  
94 here we show previously unknown patterns of chromosome-wide DNA methylation differences  
95 between male and female X chromosomes, indicating distinctive impacts of DNA methylation on

96 X chromosome inactivation in marsupials. We further classify previously undetected X-linked  
97 regions from a key marsupial species using characteristic features of X chromosome DNA  
98 methylation. Our findings provide new insights into the evolutionary pathways leading to  
99 functionally convergent yet mechanistically divergent pathways of X chromosome inactivation  
100 and regulation of gene expression in eutherian and marsupial mammals.

101

102

## Results

103

### Genome-wide patterns of DNA methylation in the modern koala

104

105

106

107

108

109

110

111

112

113

114

115

116

117

118

### Differential DNA methylation between tissues

119

120

121

122

123

124

125

126

We identified shared and tissue specific differentially methylated regions (DMRs) using BSmooth (Hansen, et al. 2012). Tissue specific DMRs were defined as regions that were differentially methylated in a particular tissue compared to all other tissues in a pairwise analysis while shared DMRs were those found in more than one tissue. Fig. 1B shows the total number of shared and tissue specific DMRs. Consistent with the results of the clustering analysis, the pancreas samples contained the greatest number of tissue specific DMRs (N=1,135) followed by the skeletal muscle, brain, kidney and lung (Fig. 1B). Interestingly, across all tissues we found that the majority (50-53%) of tissue specific DMRs fell in gene bodies (Fig. 1C, Supplementary Fig. 1, and

127 Supplementary Table 3), a significant excess compared to length and GC matched control regions  
128 (fold enrichment (FE) = 1.25~1.44,  $p < 0.0001$  based on 10,000 bootstraps; Fig. 1C,  
129 Supplementary Fig. 1 and Supplementary Table 3). Even though we observed numerous DMRs in  
130 intergenic regions, they were significantly depleted in intergenic regions compared to the control  
131 regions ( $p < 0.05$  based on 10,000 bootstraps; Fig. 1C, Supplementary Fig. 1, and Supplementary  
132 Table 3).

133 Genes containing tissue specific DMRs were enriched in specific biological functions  
134 (Table 1). Brain specific DMRs were linked to genes associated with neural developmental  
135 processes such as neurogenesis and central nervous system development. DMRs in the skeletal  
136 muscle samples were found in genes associated with actin and cytoskeleton organization. Lung  
137 and kidney DMRs were merged due to the fact that their methylation profiles were highly similar  
138 and consequently both tissues had very few unique DMRs ( $n=22$  and  $n=119$  respectively) and were  
139 linked to genes associated with several terms involving embryonic processes including organ  
140 development and morphogenesis. Pancreas specific DMRs overlapped the largest number of  
141 genes, which showed enrichment for several metabolic processes.

142 To explore the consequences of tissue specific DMRs on gene expression levels, we  
143 integrated our methylome data with a previously generated RNA-seq koala transcriptome  
144 reference (Hobbs, et al. 2014). Of the 12 tissues surveyed in that study, three tissues (kidney, brain,  
145 and lung) overlapped with the current methylome dataset. From all methylation and expression  
146 linked samples, we found significant negative correlations between promoter DNA methylation  
147 and gene expression across the entire genome, similar to the patterns observed in eutherian  
148 mammals (Table 2, Supplementary Fig. 2). The relationship between gene body DNA methylation  
149 and expression was complex. Specifically, both extremely hypomethylated and hypermethylated  
150 gene bodies showed high gene expression, again consistent with studies in eutherian mammals and  
151 other taxa (Table 2, Supplementary Fig. 2, and also (Lister, et al. 2009; Zemach, et al. 2010; Jjingo,  
152 et al. 2012; Spainhour, et al. 2019)). To directly compare the DNA methylation and expression  
153 datasets, we considered differentially methylated genes (DMGs) containing DMRs between the  
154 brain and kidney samples ( $n = 1944$  genes from  $n = 4,615$  DMRs). We then identified differentially  
155 expressed genes (DEGs) between brain and kidney RNA-seq samples. Currently, available RNA-  
156 seq data from koala do not include sufficient biological replicates. We overcame this limitation by  
157 simulating replicates within each RNA-seq data set (NOISEq, (Tarazona, et al. 2015)) and

158 identified 600 putative DEGs (probability of differential expression > 95% according to the  
159 NOISEq software). We found that DMGs were significantly more likely to be differentially  
160 expressed than genes that did not contain DMRs, exhibiting a 1.54-fold enrichment of observed to  
161 expected DMGs that were also DEGs, ( $\chi^2 = 33.07$ ,  $p < 0.0001$ ). In addition, differential expression  
162 between tissues was significantly correlated with differential DNA methylation between tissues in  
163 promoters (Supplementary Fig. 3A). In agreement with the observation from the whole genome,  
164 both relative hypomethylation and relative hypermethylation of gene bodies were associated with  
165 increased expression (Supplementary Fig. 3B). The methylation patterns of two representative  
166 genes containing brain specific DMRs are shown in Fig. 1D and 1E.

167

### 168 **Global hypomethylation of female X chromosome in koalas**

169 The koala genome project used cross-species chromosome painting data to identify 24 putative X  
170 chromosome scaffolds and 406 putative autosomal scaffolds consisting of 68 Mb and 2.9 Gb of  
171 sequences respectively (Johnson, et al. 2018). We utilized this classification to examine sex  
172 specific DNA methylation on the X chromosome and autosomes. As expected from 2:1 ratio of X  
173 chromosomes in females compared to males, the median depth of coverage of CpGs on the putative  
174 X scaffolds were significantly higher (approximately 2-fold higher) in female samples compared  
175 to male samples for all five tissues ( $p < 2.2 \times 10^{-16}$ , Mann-Whitney  $U$  test, Supplementary Fig.  
176 4A). In addition, the percent of total reads mapped to the putative X scaffolds out of all the mapped  
177 reads showed a distinct bimodal distribution whereby the male samples cluster close to 1.3% and  
178 the female samples cluster near 2.4% (Supplementary Fig. 4B). In contrast, male and female  
179 samples were indistinguishable with respect to read mapping to putative autosomes  
180 (Supplementary Fig. 4D).

181 Next, we characterized sex-based DNA methylation distributions across the autosomes and  
182 X chromosomes. We found that the global DNA methylation level of the female X chromosome  
183 was lower than that of the male X chromosome in all koala tissues examined (Fig. 2A, B and  
184 Supplementary Fig. 5,  $p < 2.2 \times 10^{-16}$ , Mann-Whitney  $U$  test). In contrast, autosomes were similarly  
185 methylated between females and males (Fig. 2A, B). A comparison to autosomal DNA methylation  
186 indicated that the X chromosome exhibits reduced DNA methylation in females. Consequently,  
187 we use the term ‘female hypomethylation’ (as opposed to male hypermethylation) (Fig. 2C)  
188 consistently in this work.

189 To gain better insights into divergent patterns between male and female X chromosomes,  
190 we examined DNA methylation in different functional regions (promoters, exons, introns, and  
191 intergenic regions). We found that, on average, the female samples were hypomethylated in all  
192 functional regions across the X chromosome (Fig. 2D). This difference was most pronounced in  
193 gene bodies and intergenic regions, while promoters showed the least sex-based difference. As  
194 expected, the autosomal scaffolds did not display a significant variation between female and male  
195 methylation levels in any functional region (Fig. 2E). Fig. 2F depicts the DNA methylation  
196 difference between male and female X chromosomes in humans. In contrast to the pattern observed  
197 in koalas, promoters on the human female X chromosomes were hypermethylated compared to  
198 those on the male X chromosome, congruent with previous studies (Hellman and Chess 2007;  
199 Keown, et al. 2017; Sun, et al. 2019).

200

### 201 **Promoter DNA methylation is not a universal driver of sex-specific expression in koalas**

202 To investigate the implications of the observed sex-specific DNA methylation, we once again  
203 utilized the published RNA-seq koala transcriptome reference (Hobbs, et al. 2014). Of the total  
204 RNA-seq dataset, only one tissue, kidney, had expression data from both a male and female koala  
205 that could be directly compared to our methylome dataset. Consequently, the other tissues were  
206 not considered for further analysis. We calculated the log-transformed fold change of female and  
207 male gene expression values using NOISeq, capitalizing on its ability to simulate technical  
208 replicates. This analysis suggested that of the 209 X-linked genes, 36 (17.2%) exhibit female  
209 overexpression while 11 (5.3%) show male overexpression (probability of sex-based differential  
210 expression > 95% based on NOISeq, Supplementary Fig. 6A). Although, on average, autosomal  
211 genes also exhibited slight female-bias of expression (Supplementary Fig. 6B, C), the increase is  
212 more substantial in X chromosome linked genes (mean chromosome X female to male log<sub>2</sub> fold  
213 change = 0.50, autosome female to male expression log<sub>2</sub> fold change = 0.24). Using the matched  
214 WGBS and RNA-seq data from the kidney samples, we calculated the female and male fractional  
215 methylation difference in X chromosome linked promoters and gene bodies and correlated them  
216 with gene expression difference (N = 209 gene bodies and N = 206 promoters, excluding 3  
217 promoters with CpGs coverage < 3). In promoters, we found no significant relationship between  
218 female and male DNA methylation difference and female-biased gene expression (Supplementary  
219 Fig. 7A). In fact, the proportions of significantly female-over expressed genes (probability of sex-



220 based differential expression > 95% based on NOISeq) were similar between female-  
221 hypermethylated promoters and female-hypomethylated promoters (Supplementary Fig. 7B).  
222 Interestingly, female and male DNA methylation difference in gene bodies showed an overall  
223 negative correlation with gene expression (Spearman's rank correlation coefficient,  $\rho = -0.14$ ,  $p =$   
224  $0.04$ , Supplementary Fig. 7C). However, a deeper analysis of the relative DNA methylation and  
225 expression levels revealed that both extreme hypomethylation and hypermethylation are associated  
226 with increased expression (Supplementary Fig. 7C) attesting to the complexity and heterogeneity  
227 of the relationship between gene body DNA methylation and gene expression (Zemach, et al. 2010;  
228 Jjingo, et al. 2012; Spainhour, et al. 2019).

229

### 230 **The *Rsx* region displays a pattern suggesting methylation driven control of X chromosome** 231 **regulation in koalas**

232 Above we have demonstrated that male and female differential methylation was the most notable  
233 in gene bodies and intergenic regions on the X chromosome. Nevertheless, sex-specific  
234 methylation of a key regulator of the X inactivation (XCI) in other marsupials, the long non-coding  
235 RNA gene *Rsx*, has been associated with its differential expression (Grant, et al. 2012; Wang, et  
236 al. 2014). To determine if differential DNA methylation is similarly associated with differential  
237 regulation of *Rsx* in koalas, we isolated a 42 Kb region to examine on the koala X chromosome  
238 based on the sequence homology with the partial assembly of the *Rsx* gene from the gray short-  
239 tailed opossum, *Monodelphis domestica* (Grant, et al. 2012). We then identified a 29.8 Kb  
240 candidate *Rsx* sequence within the isolated region from the alignment to the full koala *Rsx*  
241 sequence assembled using PacBio long read sequencing by Johnson et al. (Johnson, et al. 2018).  
242 The total examined region spanned 266 CpGs, of which 165 were covered by more than three  
243 reads in all 10 samples from the WGBS dataset. The candidate *Rsx* region harbored 93 CpGs over  
244 this read depth threshold. Because the WGBS data allows us to explore the entire genomic region  
245 around the candidate gene, we used these CpGs to examine the DNA methylation difference  
246 between male and female koala samples. Interestingly, we observed a female hypomethylated  
247 region containing two CpG islands upstream of the candidate *Rsx* covering 101 CpGs exhibiting a  
248 36% reduction in mean female DNA methylation compared to mean male DNA methylation (mean  
249 sex difference:  $-0.36 \pm 0.14$ , Fig. 3). The mean sex-based DNA methylation difference within this

250 region was in the top 23% of the distribution of differences across all X-linked scaffolds of the  
251 combined tissues.

252 Having identified an upstream female hypomethylated hotspot, we tested whether *Rsx*  
253 expression was exclusive to females, consistent with it being the X chromosome inactivation  
254 center in koalas (Hobbs, et al. 2014; Johnson, et al. 2018). We used DESeq2 (Love, et al. 2014) to  
255 determine differential gene expression on curated RNA-seq data from 8 female and 7 male koala  
256 samples obtained from 12 tissues (Hobbs, et al. 2014). As expected, the expression of the *lncRNA*  
257 annotated within the candidate *Rsx* gene region was significantly greater in females (mean  
258 normalized read count = 6987.1) than in males (mean normalized read count = 16,  $p < 0.05$  from  
259 DeSeq2 using the Wald test). When considering a subset of tissue expression data with matched  
260 male and female samples (spleen, kidney, and lung), the results remained robust across different  
261 tools to measure differential gene expression (Table 3).

262

### 263 **Identification of novel candidate X-linked scaffolds by sex specific methylation patterns**

264 We have demonstrated above that X-linked scaffolds exhibit several distinctive WGBS patterns in  
265 koalas. Namely, putative X scaffolds show different depths of coverage per CpG, distinctive  
266 clustering based on the proportion of mapped reads, and unique methylation distributions between  
267 females and males (Supplementary Fig. 4). We thus quantified DNA methylation differences  
268 between females and males to determine if additional candidate X scaffolds existed within the  
269 6.7% of the koala assembly that remained unclassified. We identified an additional 98 scaffolds  
270 which showed a clear shift towards female hypomethylation (mean female-male 5mC for all  
271 candidate X scaffolds was  $-0.25 \pm 0.12$ ) (Supplementary Table 4). These candidate scaffolds  
272 contributed 14.6 Mb (21.5%) to the total genomic region annotated as the koala X chromosome.  
273 All candidate scaffolds followed the expected bimodal distribution seen in the putative X scaffolds  
274 when we analyzed the percent of total reads mapped to the candidate X scaffolds out of all the  
275 mapped reads. The male samples clustered around 0.3% and the female samples clustered around  
276 0.5% (Supplementary Fig. 4C). This clustering pattern could be attributed to the 2:1 ratio of X  
277 chromosomes in females compared to males that was not observed in putative autosomes.

278

279

280

281

## Discussion

282 In this study, we investigated nucleotide-resolution genomic DNA methylation maps of five tissues  
283 of a male and a female koala. The overall DNA methylation levels of koala tissues are on par with  
284 the patterns observed in other eutherian mammals (Schultz, et al. 2015; Mendizabal, et al. 2016;  
285 Keown, et al. 2017), and show a clear pattern of heavy genome-wide DNA methylation punctuated  
286 by hypomethylation of CpG islands (e.g., Fig. 1D,E). We identified tissue-specific differential  
287 DNA methylated regions (DMRs), which were consistently and significantly enriched in gene  
288 bodies. Previous studies of human tissues also observed that DMRs tended to occur in gene bodies  
289 (e.g. (Mendizabal and Yi 2015; Peters, et al. 2015; Schultz, et al. 2015)). Gene body methylation  
290 is an ancestral form of DNA methylation in animal genomes (e.g., (Zemach, et al. 2010; Yi 2012)),  
291 yet its role in regulation of gene expression is less well understood than promoter DNA  
292 methylation (Zemach, et al. 2010; Jones 2012). Integrating relative DNA methylation differences  
293 and relative gene expression differences, we observe that tissue-specific hypo- and hyper  
294 methylation of gene bodies both contribute to increased gene expression (Supplementary Fig. 3B)  
295 in koalas, a characteristic previously observed in eutherian mammals and in other taxa (Lister, et  
296 al. 2009; Zemach, et al. 2010; Jjingo, et al. 2012; Mendizabal, et al. 2016). Collectively, these  
297 observations suggest that gene body methylation may be an important component of regulation of  
298 gene expression in koala.

299 The patterns of DNA methylation across the marsupial X chromosome show significant  
300 differences between sexes. Specifically, the female X chromosomes are globally hypomethylated  
301 compared to both the male X chromosome and the autosomes of both sexes (Fig. 2). Most of the  
302 literature of X chromosome inactivation emphasizes that DNA methylation is increased in  
303 promoters of the inactive X chromosomes compared to those of the active X chromosome.  
304 However, we show that the hypomethylation of the female X chromosome observed in koala is in  
305 fact consistent with DNA methylation data from eutherian mammals. We summarized the current  
306 knowledge from eutherian mammals and our proposed model for marsupials in Fig. 4. Concisely,  
307 in eutherians, while DNA methylation of promoter regions and CpG islands increase on the  
308 inactive X chromosome, gene bodies and intergenic regions of the inactive X chromosome are  
309 relatively depleted of DNA methylation compared to the active X chromosome (Fig. 4). Hellmann  
310 and Chess (Hellman and Chess 2007) demonstrated the difference between promoter and gene  
311 body DNA methylation of active and inactive X chromosomes in humans. An array based DNA

312 methylation study of humans (Cotton, et al. 2015) and whole genome bisulfite sequencing analyses  
313 of mouse (Keown, et al. 2017) and humans (Sun, et al. 2019) showed that the hypomethylation of  
314 inactive X chromosome is pervasive in gene bodies and intergenic regions.

315 In marsupials, Rens et al. (Rens, et al. 2010) observed hypomethylation of the inactive X  
316 chromosome through immuno-staining using antibodies against methyl-cytosines in two species,  
317 common brushtail possum (*Trichosurus vulpecula*) and long-nosed potoroo (*Potorous tridactylus*).  
318 Waters et al. (Waters, et al. 2018) have also observed female hypomethylation of the X  
319 chromosome in gray-tailed opossum (*Monodelphis domestica*) using reduced representation  
320 bisulfite sequencing (RRBS). In contrast to Keown et al. (Keown, et al. 2017), Waters et al.  
321 (Waters, et al. 2018) did not observe substantial hypomethylation of mouse X chromosomes. They  
322 thus concluded that the reduction of methylation in gene bodies was specific to marsupials (Waters,  
323 et al. 2018). The discrepancy between Keown et al. (Keown, et al. 2017) and Waters et al. (Waters,  
324 et al. 2018) could be due to the inherent bias of the RRBS method, used in the latter study, which  
325 disproportionately samples regions with high GC content (Sun, et al. 2015). High GC-content  
326 regions tend to be hypomethylated (Elango, et al. 2008; Cotton, et al. 2015) and show less variation  
327 of DNA methylation between males and females (Cotton, et al. 2015), which we also demonstrate  
328 below (Supplementary Fig. 7).

329 It was previously suggested that differential DNA methylation does not play substantial  
330 roles in marsupial X chromosome gene regulation (Piper, et al. 1993; Loebel and Johnston 1996;  
331 Wang, et al. 2014) due to the lack of DNA methylation difference in promoters and CpG islands  
332 (also in (Waters, et al. 2018)). Here we show that promoters are, on average, clearly  
333 hypomethylated in female tissues compared to male tissues in koalas, although the degree of  
334 methylation difference is small compared to other genomic regions. This modest sex-based  
335 difference may at least partly be attributed to the fact that promoters tend to be GC-rich  
336 (Supplementary Fig. 7). Due to the negative correlation between GC-content and DNA  
337 methylation, these lowly methylated regions are inherently less variable and would subsequently  
338 show subtle differences between sexes ((Cotton, et al. 2015) and Supplementary Fig. 7).  
339 Summarizing these findings, we observe that the hypermethylation of promoters on the inactive X  
340 chromosome appears to be restricted to eutherian mammals, while chromosome-wide  
341 hypomethylation of female X chromosome (Fig. 4), consistent with the hypomethylation of the  
342 inactive X chromosome, is conserved between eutherian and marsupial mammals. How

343 chromosome-wide DNA hypomethylation is linked to chromosome-wide gene silencing is  
344 currently unknown, and likely to involve other epigenetic marks. Analyses of DNMT expression,  
345 including that of a newly duplicated *DNMT1* (Alvarez-Ponce, et al. 2018), did not indicate  
346 significant differential expression between sexes (Results not shown). However, additional  
347 analysis of data with broad and balanced sampling of both sexes is necessary to rigorously test the  
348 impact of the marsupial *DNMT1* duplication on sex specific gene expression.

349 Interestingly, despite the fact that gene regulation by sex-specific promoter DNA  
350 methylation is not a global phenomenon in marsupials, the *lncRNA Rsx*, the major player in XCI  
351 initiation in marsupials (Grant, et al. 2012), presents an exception. Similar to the mechanism of  
352 activation of the *Xist* RNA in eutherian mammals, *Rsx* is exclusively transcribed from and coats  
353 the inactive X chromosome initiating the XCI process through which the inactive X chromosome  
354 adopts a specific chromatin configuration within cells (Galupa and Heard 2018). Observed  
355 signatures unique to female koala samples suggest that *Rsx* expression is regulated by promoter  
356 DNA methylation, while gene body methylation of *Rsx* is similar between males and females (Fig.  
357 3). Wang et al. (Wang, et al. 2014) showed that the *Rsx* promoter in opossum is also regulated by  
358 differential DNA methylation of CpG islands. Therefore, regulation of the key initiator of XCI via  
359 DNA methylation is another parallel feature between eutherians and marsupials, although utilizing  
360 distinctive components. In addition, a recent study (Sprague, et al. 2019) found that *Xist* and *Rsx*  
361 harbor non-linear sequence similarity. Consequently, their shared functionality may be partially  
362 due to characteristics of tandem repeat regions.

363 Therefore, we show that the overarching hypomethylation of female X chromosome is a  
364 conserved feature of X chromosome regulation in eutherian and marsupial mammals. However, X  
365 chromosome promoter methylation and the subsequent effect on the regulation of gene expression  
366 between males and females appear to be divergent between these two lineages. Regulation of the  
367 *Rsx*, on the other hand, is supported by DNA methylation, which mirrors the regulation of the  
368 eutherian *Xist* locus. Together, these conclusions illuminate the intricate evolutionary pathways  
369 that have diverged and converged to influence X chromosome regulation, XCI, and dosage  
370 compensation in eutherian and marsupial mammals.

371

372

373

374

## Materials and Methods

### 375 Whole Genome Bisulfite Sequencing Data Generation

376 All genomic DNA was extracted using a Bioline Isolate II Genomic DNA Extraction Kit (Cat#.  
377 BIO-52067) following the recommended protocol with an additional DNase free RNaseA  
378 (100mg/ml) (Qiagen cat. #19101) treatment before column purification. 20mg tissue samples from  
379 brain, kidney, lung, skeletal muscle, and pancreas from a female koala, “Pacific Chocolate”  
380 (Australian Museum registration M.45022), and a male koala, “Ben” (Australian Museum  
381 registration M.47723), were supplied to the Ramaciotti Centre for Genomics for methylome  
382 sequencing. The bisulfite conversion was carried out by using the EX DNA Methylation-Lightning  
383 Kit (Zymo cat. #D5030) and the WGBS libraries were constructed using the TruSeq DNA  
384 methylation kit (Illumina cat.# EGMK81213). The libraries were sequenced on a NovaSeq6000  
385 S2 (Illumina) using the 2 × 100bp PE option. Information on samples, coverage, and the numbers  
386 of reads are provided in Supplementary Table 1.

387

### 388 WGBS Data Processing

389 Paired-end raw fastq files were processed for quality control and adapter trimming using Trim  
390 Galore! (version 0.3.7) with a Phred score threshold of 20. Trimmed reads were filtered for phi-  
391 X174 (NC\_001422.1) to remove the spike-in control before being mapped to the koala reference  
392 assembly (phaCin\_unsw\_v4.1; (Johnson, et al. 2018)) using Bismark with the Bowtie 2 setting  
393 and deduplicated. The current koala genome reference assembly was generated from the same  
394 female koala (“Pacific Chocolate,” Australian Museum registration M.45022) that we used to  
395 obtain the female WGBS data. Bisulfite conversion rates were estimated for each WGBS sample  
396 following the methodology of methPipe's bsrates (Song, et al. 2013) (Supplementary Table 1).  
397 Strand-specific methylation calls were combined, and all samples were filtered to remove CpGs  
398 covered by fewer than three reads. See Supplementary Table 1 for an overview of the dataset.

399

### 400 Analyses of tissue differentially methylated regions

401 A hierarchical clustering tree was drawn using the fractional methylation profiles of all ten samples  
402 representing five tissues using *hclust* from R's stats package. The distance matrix was calculated  
403 using Euclidean distances and the agglomeration method used was Ward's method. The data for  
404 the final tree was visualized using R's dendextend package (Galili 2015).

405  
406 Before identifying differentially methylated regions (DMRs), all Bismark generated CpG reports  
407 were filtered to remove scaffolds that were less than 2 Mb in length. Following this step, we  
408 retained  $3.03 \times 10^9$  positions for downstream analyses, covering 94.8% of the genome. DMRs  
409 were called using BSmooth (Hansen, et al. 2012) in 10 pairwise comparisons of all five tissues.  
410 Detected DMRs with a minimum fractional methylation difference of 0.3 (30%) between each pair  
411 of compared tissues that also contained at least 5 CpG sites were retained. Shared DMRs were  
412 defined as those that overlapped at least 50% in multiple tissues. The distribution of common and  
413 tissue specific DMRs located among different genomic functional regions (promoters, gene bodies,  
414 and intergenic regions) were identified based on koala gene annotations from Ensembl  
415 (*Phascolarctos\_cinereus.phaCin\_unsw\_v4.1.97* release). Promoters were defined as regions  
416 located 1000 bp upstream of the identified transcription start site (TSS). To test the enrichment of  
417 tissue specific DMRs in the previously specified genomic regions, we generated 10,000 length and  
418 GC content matched control regions for all unique DMRs, and calculated the p-values from the  
419 ratio of the number of simulations with values at least as extreme as the observed ones over the  
420 total number of simulations.

421 The genes containing tissue specific DMRs were extracted to make a set of differentially  
422 methylated genes unique to each analyzed tissue. As mentioned above, the lung and kidney  
423 samples shared the most similar methylation profiles and consequently had few tissue specific  
424 DMRs (Fig. 1C). Because of this feature, the corresponding gene sets were combined for these  
425 two tissues. Functional annotation and GO term enrichment analysis was performed utilizing the  
426 ToppGene Suite (Chen, et al. 2009).

427  
428 **Quantifying sex differences in DNA methylation across chromosomes and functional regions**

429 Johnson et al. (Johnson, et al. 2018) used cross-species chromosome painting data and linked 406  
430 scaffolds spanning 2.9 Gb of sequence data to autosomal scaffolds from chromosomes 1-7 and 24  
431 scaffolds covering 68 Mb of sequence data to chromosome X, leaving 6.7% of the genome  
432 unclassified. To explore the same relative amount of genomic space, we randomly sampled a  
433 subset of the autosomal scaffolds that were length matched with the X chromosome scaffolds,  
434 which we called the “matched autosome” dataset. Separately, all matched autosome and  
435 chromosome X scaffolds were divided into 10-kb bins and the mean fractional methylation levels

436 of the corresponding CpGs were calculated for each of the 5 tissue samples. The difference in  
437 mean fractional methylation at each 10-kb bin was computed between male and female samples  
438 for all tissues. For our comparative analysis with human sex-specific DNA methylation, we  
439 downloaded publicly available WGBS fractional methylation reports from a male brain  
440 (Epigenome ID: E071) and a female brain (Epigenome ID: E053) generated by the Roadmap  
441 Epigenomics Consortium (Kundaje, et al. 2015) and used CpGs with minimum 3× coverage. Due  
442 to its similarity in size to the human X chromosome, we used data from human chromosome 8 as  
443 our representative autosome in the comparative analysis.

444 For the analysis of sex-based fractional DNA methylation across different genomic  
445 functional regions, we used the previously defined koala gene annotations from Ensembl  
446 (*Phascolarctos\_cinereus.phaCin\_unsw\_v4.1.97* release) and human known gene annotations from  
447 Ensembl (hg19 release). Individual annotated promoters, exons, introns, and intergenic regions  
448 were evenly divided into 20 bins and the mean fractional methylation of CpGs within each bin was  
449 computed.

450

#### 451 **Identification of candidate X-linked scaffolds**

452 To isolate candidate scaffolds potentially located on the X chromosome from the 1,477  
453 unclassified scaffolds covering 6.7% of the koala genome, we binned the remnant scaffolds into  
454 10-kb windows and calculated the mean fractional methylation of the associated CpGs. We then  
455 determined the average female and male methylation differences across the bins and plotted the  
456 density of the differences for all five tissues. SVY and DS proceeded to independently select  
457 scaffolds that exhibited a statistically significant shift towards female hypomethylation from zero  
458 based on an initial visual examination. The scaffolds that showed significant female  
459 hypomethylation in all five tissues and were selected by both SVY and DS were then further  
460 analyzed (n = 98 covering 14.6 Mb of sequence with mean female-male 5mC =  $-0.25 \pm 0.12$ ). As  
461 a baseline for an external validation, the percent of reads mapping to the putative X-linked and  
462 autosome-linked scaffolds over the total number of mapped reads was computed for the male and  
463 female sample in all tissues. The expectation was that the female samples would show and increase  
464 in reads mapped to the X-linked scaffolds compared to the male samples due to the 2:1 ratio of X  
465 chromosomes in females to males. This sex-biased separation is not expected across length  
466 matched autosome-linked scaffolds as autosome counts are balanced in both sexes. Once this



467 baseline analysis was confirmed, we calculated the percent of reads mapping to the candidate X-  
468 linked scaffolds over the total number of mapped reads from all 10 samples.

469

### 470 **Annotation of the *Rsx* Region**

471 To annotate the genomic region around *Rsx*, we downloaded the published genome sequence fasta  
472 files for the partial assembly of *Rsx* from the gray short-tailed opossum (Grant, et al. 2012) and  
473 the complete PacBio assembly of the koala *Rsx* (Johnson, et al. 2018; Sprague, et al. 2019). We  
474 then used BLASTN 2.2.29 (Zhang, et al. 2000) to align both sequences to the koala reference  
475 genome (phaCin\_unsw\_v4.1) and obtained genomic coordinates information. As expected, both  
476 sequences aligned to a scaffold previously linked to the X chromosome and overlapped with one  
477 another. The entire assembled koala *Rsx* sequence aligned with 100% identity and no gaps.

478

### 479 **RNA-seq Data Processing**

480 All RNA-seq expression data used in this analysis were obtained from the previously published  
481 koala transcriptome reference (Hobbs, et al. 2014). This dataset included eight tissues from a  
482 female koala, spleen (SRR1203868), liver (SRR1205138), uterus (SRR1205176), kidney  
483 (SRR1205998), lung (SRR1205218), heart (SRR1205223), brain (SRR1205222), adrenal glands  
484 (SRR1205224), and seven tissues from a male koala, salivary gland (SRR1207973), kidney  
485 (SRR1207974), testes (SRR1207975), bone marrow (SRR1106690), lymph node (SRR1106707),  
486 liver (SRR1121764), and spleen (SRR1122141). To process the acquired data, we followed the  
487 protocol outlined by Pertea et al. (Pertea, et al. 2016). Briefly, raw reads were filtered for low  
488 quality and trimmed of adapter sequences by Trim Galore! (version 0.3.7) before alignment to the  
489 reference koala genome (phaCin\_unsw\_v4.1) using HISAT2 (Kim, et al. 2015). We used the koala  
490 GTF annotation from Ensembl (Phascolarctos\_cinereus.phaCin\_unsw\_v4.1.97.gtf.gz release) to  
491 assemble mapped reads into transcripts using StringTie 2.0 (Pertea, et al. 2016) with the -e-b--A  
492 <gene\_abund.tab> flags. We chose to use StringTie's functionality for an additional *de novo*  
493 transcript assembly to quantify transcripts not currently annotated in the koala reference,  
494 specifically those associated with the *lncRNA Rsx*. First, a new GTF annotation was generated  
495 including novel transcripts using the --merge flag and then the previously generated mapped reads  
496 were reassembled into transcripts guided by the novel GTF file.

497

## 498 **Analysis of sex-based differential gene expression**

499 Gene expression for the previously annotated and novel transcripts was measured for all fifteen  
500 samples available. Using the prepDE.py script from Stringtie 2.0 (Pertea, et al. 2016), we generated  
501 a raw expression count matrix containing the data from all male and female samples. Subsequently,  
502 we inputted the count matrix into DeSeq2 1.22.2 (Love, et al. 2014), which uses the median of  
503 ratios method to normalize raw expression data for sequencing depths and RNA composition to  
504 perform differential gene expression analysis. Considering all eight female and seven male  
505 samples, we first sought to specifically test the male and female differential expression of the  
506 annotated *Rsx* region from the novel transcript analysis. Only one 30.4 kb transcript, a novel  
507 *lncRNA*, overlapped with the annotated *Rsx* region (overlap > 90% of transcript) and was used to  
508 evaluate gene expression. From DeSeq2's output, we collected data on the normalized male and  
509 female expression counts, the log transformed fold change ( $\log_2[\text{female expression}/\text{male}$   
510  $\text{expression}]$ ), and the p-value associated with the sex-based differential expression. We also  
511 performed a permutation of this analysis by only considering the tissues that had both a male and  
512 female sample, namely the kidney, lung, and spleen.

513 NOISEq 2.26.1 (Tarazona, et al. 2015) was used for differential expression analysis due to  
514 its ability to simulating technical replicates within given RNA-seq data sets when no replicates are  
515 available. Using the raw count matrix from annotated transcripts, we generated sex-specific  
516 differentially methylated genes for one dataset considering only the male and female kidney data  
517 and another dataset considering the three tissues with male and female samples (kidney, lung, and  
518 spleen). We compared the gene expression outputs for the three tissue datasets generated by both  
519 DeSeq2 and NOISEq and found highly consistent results when considering the female over male  
520 expression change values for all genes (Spearman's rank correlation coefficient,  $\rho = 0.997$ ,  $p < 2.2$   
521  $\times 10^{-16}$ ).

## 523 **Availability of data and materials**

524 The raw and processed methylation datasets generated in this study have been deposited in the  
525 NCBI Gene Expression Omnibus (Edgar, et al. 2002).

526  
527  
528

529

530

## Acknowledgements

531 This work was supported by a grant from the National Science Foundation (MCB 1818288) and a  
532 Pilot Grant from the Smooth Muscle Plasticity COBRE of the University of Nevada, Reno (funded  
533 by the National Institutes of Health grant 5P30GM110767-04) to DAP, grants by the National  
534 Science Foundation (MCB 1615664) and the National Institute of Health (R01MH103517) to  
535 SVY. In addition, DS was partially supported by the NIH Training Grant in Computational  
536 Biology and Biomedical Genomics (T32 GM105490).

537

538

## References

- 539 Alvarez-Ponce D, Torres-Sanchez M, Feyertag F, Kulkarni A, Nappi T. 2018. Molecular evolution  
540 of DNMT1 in vertebrates: Duplications in marsupials followed by positive selection. PLOS  
541 ONE 13.
- 542 Black KH, Price GJ, Archer M, Hand SJ. 2014. Bearing up well? Understanding the past, present  
543 and future of Australia's koalas. *Gondwana Research* 25:1186-1201.
- 544 Brown CJ, Hendrich BD, Rupert JL, Lafreniere RG, Xing Y, Lawrence J, Willard HF. 1992. The  
545 human XIST gene: analysis of a 17 kb inactive X-specific RNA that contains conserved  
546 repeats and is highly localized within the nucleus. *Cell* 71:527-542.
- 547 Chen J, Bardes EE, Aronow BJ, Jegga AG. 2009. ToppGene Suite for gene list enrichment analysis  
548 and candidate gene prioritization. *Nucleic Acids Res* 37:W305-311.
- 549 Cotton AM, Price EM, Jones MJ, Balaton BP, Kobor MS, Brown CJ. 2015. Landscape of DNA  
550 methylation on the X chromosome reflects CpG density, functional chromatin state and X-  
551 chromosome inactivation. *Hum Mol Genet* 24:1528-1539.
- 552 Duret L, Chureau C, Samain S, Weissenbach J, Avner P. 2006. The Xist RNA gene evolved in  
553 eutherians by pseudogenization of a protein-coding gene. *Science* 312:1653-1655.
- 554 Edgar R, Domrachev M, Lash AE. 2002. Gene Expression Omnibus: NCBI gene expression and  
555 hybridization array data repository. *Nucleic Acids Res* 30:207-210.
- 556 Elango N, Kim S-H, Program NCS, Vigoda E, Yi SV. 2008. Mutations of different molecular  
557 origins exhibit contrasting patterns of regional substitution rate variation. *PLoS*  
558 *Computational Biology* 4:e1000015.
- 559 Galili T. 2015. dendextend: an R package for visualizing, adjusting and comparing trees of  
560 hierarchical clustering. *Bioinformatics (Oxford, England)* 31:3718-3720.
- 561 Galupa R, Heard E. 2018. X-Chromosome Inactivation: A Crossroads Between Chromosome  
562 Architecture and Gene Regulation. *Annual Review of Genetics* 52:535-566.
- 563 Goll MG, Bestor TH. 2005. Eukaryotic Cytosine Methyltransferases. *Annual Review of*  
564 *Biochemistry* 74:481-514.
- 565 Grant J, Mahadevaiah SK, Khil P, Sangrithi MN, Royo H, Duckworth J, McCarrey JR, VandeBerg  
566 JL, Renfree MB, Taylor W, et al. 2012. Rsx is a metatherian RNA with Xist-like properties  
567 in X-chromosome inactivation. *Nature* 487:254.
- 568 Hansen KD, Langmead B, Irizarry RA. 2012. BSmooth: from whole genome bisulfite sequencing  
569 reads to differentially methylated regions. *Genome biology* 13:R83.

- 570 Heard E. 2005. Delving into the diversity of facultative heterochromatin: the epigenetics of the  
571 inactive X chromosome. *Curr Opin Genet Dev* 15:482-489.
- 572 Heard E, Clerc P, Avner P. 1997. X-chromosome inactivation in mammals. *Annu Rev Genet*  
573 31:571-610.
- 574 Hellman A, Chess A. 2007. Gene body-specific methylation on the active X chromosome. *Science*  
575 315:1141-1143.
- 576 Hobbs M, Pavasovic A, King AG, Prentis PJ, Eldridge MDB, Chen Z, Colgan DJ, Polkinghorne  
577 A, Wilkins MR, Flanagan C, et al. 2014. A transcriptome resource for the koala  
578 (*Phascolarctos cinereus*): insights into koala retrovirus transcription and sequence  
579 diversity. *BMC Genomics* 15:786.
- 580 Huynh KD, Lee JT. 2003. Inheritance of a pre-inactivated paternal X chromosome in early mouse  
581 embryos. *Nature* 426:857-862.
- 582 Jjingo D, Conley AB, Yi SV, Lunyak VV, Jordan IK. 2012. On the presence and role of human  
583 gene-body DNA methylation. *Oncotarget* 3:462.
- 584 Johnson RN, O'Meally D, Chen Z, Etherington GJ, Ho SYW, Nash WJ, Grueber CE, Cheng Y,  
585 Whittington CM, Dennison S, et al. 2018. Adaptation and conservation insights from the  
586 koala genome. *Nature Genetics* 50:1102-1111.
- 587 Jones PA. 2012. Functions of DNA methylation: islands, start sites, gene bodies and beyond. *Nat*  
588 *Rev Genet* 13:484-492.
- 589 Kasai F, O'Brien PCM, Pereira JC, Ferguson-Smith MA. 2018. Marsupial chromosome DNA  
590 content and genome size assessed from flow karyotypes: invariable low autosomal GC  
591 content. *Royal Society open science* 5:171539-171539.
- 592 Keown CL, Berletch JB, Castanon R, Nery JR, Disteche CM, Ecker JR, Mukamel EA. 2017.  
593 Allele-specific non-CG DNA methylation marks domains of active chromatin in female  
594 mouse brain. *Proceedings of the National Academy of Sciences* 114:E2882.
- 595 Kim D, Langmead B, Salzberg SL. 2015. HISAT: a fast spliced aligner with low memory  
596 requirements. *Nature methods* 12:357-360.
- 597 Koina E, Chaumeil J, Greaves IK, Tremethick DJ, Graves JA. 2009. Specific patterns of histone  
598 marks accompany X chromosome inactivation in a marsupial. *Chromosome Res* 17:115-  
599 126.
- 600 Krueger F, Andrews SR. 2011. Bismark: a flexible aligner and methylation caller for Bisulfite-Seq  
601 applications. *Bioinformatics (Oxford, England)* 27:1571-1572.
- 602 Kundaje A, Meuleman W, Ernst J, Bilenky M, Yen A, Heravi-Moussavi A, Kheradpour P, Zhang  
603 Z, Wang J, Ziller MJ, et al. 2015. Integrative analysis of 111 reference human epigenomes.  
604 *Nature* 518:317-330.
- 605 Leonhardt H, Page AW, Weier H-U, Bestor TH. 1992. A targeting sequence directs DNA  
606 methyltransferase to sites of DNA replication in mammalian nuclei. *Cell*:865-873.
- 607 Lister R, Pelizzola M, Dowen RH, Hawkins RD, Hon G, Tonti-Filippini J, Nery JR, Lee L, Ye Z,  
608 Ngo Q-M. 2009. Human DNA methylomes at base resolution show widespread  
609 epigenomic differences. *Nature* 462:315-322.
- 610 Loebel D, Johnston PG. 1996. Methylation analysis of a marsupial X-linked CpG island by  
611 bisulfite genomic sequencing. *Genome research* 6:114-123.
- 612 Love MI, Huber W, Anders S. 2014. Moderated estimation of fold change and dispersion for RNA-  
613 seq data with DESeq2. *Genome biology* 15:550.
- 614 Lyon MF. 1961. Gene Action in the X-chromosome of the Mouse (*Mus musculus* L.). *Nature*  
615 190:372-373.

- 616 Mendizabal I, Shi L, Keller TE, Konopka G, Preuss TM, Hsieh TF, Hu E, Zhang Z, Su B, Yi SV.  
617 2016. Comparative Methylome Analyses Identify Epigenetic Regulatory Loci of Human  
618 Brain Evolution. *Mol Biol Evol* 33:2947-2959.
- 619 Mendizabal I, Yi SV. 2015. Whole-genome bisulfite sequencing maps from multiple human  
620 tissues reveal novel CpG islands associated with tissue-specific regulation. *Human*  
621 *Molecular Genetics* 25:69-82.
- 622 Ng K, Pullirsch D, Leeb M, Wutz A. 2007. Xist and the order of silencing. *EMBO reports* 8:34-  
623 39.
- 624 Ogawa Y, Kakumoto K, Yoshida T, Kuwako K-i, Miyazaki T, Yamaguchi J, Konno A, Hata J,  
625 Uchiyama Y, Hirai H, et al. 2018. Elavl3 is essential for the maintenance of Purkinje  
626 neuron axons. *Scientific Reports* 8:2722.
- 627 Okamoto I, Otte AP, Allis CD, Reinberg D, Heard E. 2004. Epigenetic dynamics of imprinted X  
628 inactivation during early mouse development. *Science* 303:644-649.
- 629 Pertea M, Kim D, Pertea GM, Leek JT, Salzberg SL. 2016. Transcript-level expression analysis of  
630 RNA-seq experiments with HISAT, StringTie and Ballgown. *Nature Protocols* 11:1650-  
631 1667.
- 632 Peters TJ, Buckley MJ, Statham AL, Pidsley R, Samaras K, V Lord R, Clark SJ, Molloy PL. 2015.  
633 De novo identification of differentially methylated regions in the human genome.  
634 *Epigenetics & Chromatin* 8:6.
- 635 Piper AA, Bennett AM, Noyce L, Swanton MK, Cooper DW. 1993. Isolation of a clone partially  
636 encoding hill kangaroo X-linked hypoxanthine phosphoribosyltransferase: Sex differences  
637 in methylation in the body of the gene. *Somatic Cell and Molecular Genetics* 19:141-159.
- 638 Plath K, Mlynarczyk-Evans S, Nusinow DA, Panning B. 2002. Xist RNA and the mechanism of  
639 X chromosome inactivation. *Annu Rev Genet* 36:233-278.
- 640 Price GJ. 2008. Is the modern koala (*Phascolarctos cinereus*) a derived dwarf of a Pleistocene  
641 giant? Implications for testing megafauna extinction hypotheses. *Quaternary Science*  
642 *Reviews* 27:2516-2521.
- 643 Rens W, Wallduck MS, Lovell FL, Ferguson-Smith MA, Ferguson-Smith AC. 2010. Epigenetic  
644 modifications on X chromosomes in marsupial and monotreme mammals and implications  
645 for evolution of dosage compensation. *Proceedings of the National Academy of Sciences*  
646 107:17657.
- 647 Schultz MD, He Y, Whitaker JW, Hariharan M, Mukamel EA, Leung D, Rajagopal N, Nery JR,  
648 Urich MA, Chen H, et al. 2015. Human body epigenome maps reveal noncanonical DNA  
649 methylation variation. *Nature* 523:212-216.
- 650 Sharman GB. 1971. Late DNA Replication in the Paternally Derived X Chromosome of Female  
651 Kangaroos. *Nature* 230:231-232.
- 652 Shevchenko AI, Zakharova IS, Zakian SM. 2013. The evolutionary pathway of x chromosome  
653 inactivation in mammals. *Acta naturae* 5:40-53.
- 654 Song Q, Decato B, Hong EE, Zhou M, Fang F, Qu J, Garvin T, Kessler M, Zhou J, Smith AD.  
655 2013. A Reference Methylome Database and Analysis Pipeline to Facilitate Integrative and  
656 Comparative Epigenomics. *PLOS ONE* 8:e81148.
- 657 Spainhour JCG, Lim HS, Yi SV, Qiu P. 2019. Correlation Patterns Between DNA Methylation  
658 and Gene Expression in The Cancer Genome Atlas. *Cancer Informatics*  
659 18:1176935119828776.

- 660 Sprague D, Waters SA, Kirk JM, Wang JR, Samollow PB, Waters PD, Calabrese JM. 2019.  
661 Nonlinear sequence similarity between the Xist and Rxs long noncoding RNAs suggests  
662 shared functions of tandem repeat domains. *RNA* 25:1004-1019.
- 663 Sun D, Maney DL, Layman TS, Chatterjee P, Yi SV. 2019. Regional epigenetic differentiation of  
664 the Z Chromosome between sexes in a female heterogametic system. *Genome research*  
665 29:1673-1684.
- 666 Sun Z, Cunningham J, Slager S, Kocher J-P. 2015. Base resolution methylome profiling:  
667 considerations in platform selection, data preprocessing and analysis. *Epigenomics* 7:813-  
668 828.
- 669 Tarazona S, Furio-Tari P, Turra D, Pietro AD, Nueda MJ, Ferrer A, Conesa A. 2015. Data quality  
670 aware analysis of differential expression in RNA-seq with NOISeq R/Bioc package.  
671 *Nucleic Acids Res* 43:e140.
- 672 Wang X, Douglas KC, Vandeberg JL, Clark AG, Samollow PB. 2014. Chromosome-wide  
673 profiling of X-chromosome inactivation and epigenetic states in fetal brain and placenta of  
674 the opossum, *Monodelphis domestica*. *Genome research* 24:70-83.
- 675 Waters SA, Livernois AM, Patel H, O'Meally D, Craig JM, Marshall Graves JA, Suter CM, Waters  
676 PD. 2018. Landscape of DNA Methylation on the Marsupial X. *Molecular Biology and*  
677 *Evolution* 35:431-439.
- 678 Yi SV. 2012. Birds do it, bees do it, worms and ciliates do it too: DNA methylation from  
679 unexpected corners of the tree of life. *Genome biology* 13:174.
- 680 Zemach A, McDaniel IE, Silva P, Zilberman D. 2010. Genome-wide evolutionary analysis of  
681 eukaryotic DNA methylation. *Science* 328:916-919.
- 682 Zhang Z, Schwartz S, Wagner L, Miller W. 2000. A greedy algorithm for aligning DNA sequences.  
683 *J Comput Biol* 7:203-214.

684

685

686

687

688

689

## 690 **Figure Legends**

691 **Figure 1. Overview of DNA methylation patterns across the koala genome.** (A) Hierarchical  
692 clustering of all 10 Whole Genome Bisulfite (WGBS) CpG reports representing five tissues using  
693 Euclidean distances and Ward's agglomeration method. (B) Matrix reporting tissue-specific and  
694 shared differentially methylation regions (DMRs) based on the pairwise comparison of DMRs  
695 between tissues. (C) Considering data from brain, the total count of tissue specific DMRs falling  
696 within one of three annotated genomic regions: promoters, gene bodies, and intergenic regions.  
697 The enrichment of DMRs in each functional region is shown through a comparison with length  
698 and GC matched control regions (\*\* $p < 0.0001$ , n.s. Not significant, from 10,000 bootstraps).  
699 Error bars depict standard deviation. (D-E) Examples of two brain-specific DMRs (highlighted in  
700 grey) with the corresponding CpG fractional methylation values reported for all WGBS samples  
701 including the two brain (red) and eight remaining tissues (blue). Line smoothing performed using  
702 local regression (LOESS). (D) *ELAVL3* is a neural specific RNA-binding protein highly expressed  
703 in adult mammalian brains and linked to the maintenance of Purkinje neuron axons (Ogawa, et al.  
704 2018). A 1.84 kb region containing three CpG Islands (CGI) and overlapping the first exon of  
705 *ELAVL3* was highly methylated (hypermethylated) in the brain samples compared to all other  
706 tissues, and this gene was up-regulated in the brain compared to the kidneys (log-transformed brain  
707 to kidney ratio = 15.4, probability of differential expression > 98% from NOISEq). (E) *ALDOC*  
708 encodes a catalytic enzyme responsible for the conversion of fructose-1,6-bisphosphate to  
709 glyceraldehyde 3-phosphate and dihydroxyacetone phosphate. A 945 bp, brain-specific lowly  
710 methylated (hypomethylated) DMR overlaps the promoter and part of *ALDOC*'s gene body, and  
711 this gene was up-regulated in koala brain samples compared to the kidney samples (log-  
712 transformed brain to kidney ratio = 5.45, probability of differential expression > 96% from  
713 NOISEq).

714  
715 **Figure 2. Global patterns of female and male DNA methylation (5mC) across eutherian and**  
716 **marsupial X chromosomes.** (A) Comparison of chromosome-wide sex-based DNA methylation  
717 differences in human brain and koala brain samples. The distribution of differences in female and  
718 male mean CpG fractional methylation is shown for autosomes and X chromosomes in human and  
719 koala data (B) The combined distribution of female and male differences of mean CpG fractional  
720 methylation from koala brain, lung, kidney, skeletal muscle and pancreas samples. For A-B, the

721 difference of female and male mean fractional methylation was calculated for 10 kb bins across  
722 each autosome- or X-linked scaffold (\*\*\* indicated  $p < 2.2 \times 10^{-16}$ , Mann-Whitney U test). (C)  
723 Mean female and male fractional DNA methylation across autosomes and X chromosomes from  
724 human brain and koala brain samples. For D-F, mean fractional methylation levels across X-linked  
725 or autosome-linked gene regions in male and female whole genome bisulfite (WGBS) samples  
726 across genomic functional regions (promoters, exons, introns, and intergenic regions). Functional  
727 regions were divided into 20 equally spaced bins and the mean fractional methylation of the  
728 corresponding CpGs were calculated for all male (purple) and female (orange) samples. Line  
729 smoothing was performed using local regression (LOESS). (D) Average fractional methylation of  
730 CpGs in 100-bp sliding windows using a 10 bp step size in a 5 Kb region upstream and downstream  
731 of all chromosome X linked gene's transcription start sites (TSSs) across all five koala tissues.

732

733 **Figure 3. Annotation of genomic of DNA methylation (5mC) around *Rsx*.** The genomic  
734 coordinates are shown above the figure in grey isolating a 57 kb window containing the annotated  
735 *Rsx* region (blue gene model below). The top panel identifies CpG islands (CGI), the middle panel  
736 reports the absolute male (purple) and female (orange) fractional methylation at each CpG, and the  
737 bottom panel show the female and male fractional methylation difference. Highlighted in grey  
738 across all panels is the identifies female hypomethylated hotspot containing 101 CpGs and two  
739 CGIs upstream of the *Rsx* transcription start site.

740

741 **Figure 4. Model of DNA methylation (5mC) patterns across genomic functional regions for**  
742 **eutherian mammals and marsupials.** In summary, eutherian mammals exhibit increased DNA  
743 methylation of promoter regions and CpG islands coupled with a relative depletion of DNA  
744 methylation across gene bodies and intergenic regions on the inactive X chromosome ( $X_I$ )  
745 compared to the active X chromosome ( $X_A$ ) in females. Marsupial mammals share similar DNA  
746 methylation depletion in gene bodies and intergenic regions of the inactive X chromosome;  
747 however, they diverge from eutherian mammals in their promoter methylation patterns. Marsupial  
748 promoters are modestly hypomethylated in the female X chromosomes ( $X_A$  and  $X_I$ ) compared to  
749 the male X chromosome ( $X_M$ ).



750 **Tables**

751

752 **Table 1.** Functional annotation of enriched biological processes associated with gene sets containing tissue specific differentially  
 753 methylated regions (DMRs).

| 754 | <b>Tissue</b>   | <b>GO biological process term</b>        | <b>Accession ID</b> | <b>p-value</b>         | <b>q-value</b>         |
|-----|-----------------|------------------------------------------|---------------------|------------------------|------------------------|
| 755 |                 |                                          |                     |                        |                        |
| 756 | Brain           | central nervous system development       | GO:0007417          | $5.79 \times 10^{-13}$ | $2.71 \times 10^{-09}$ |
| 757 | Brain           | generation of neurons                    | GO:0048699          | $1.47 \times 10^{-12}$ | $3.45 \times 10^{-09}$ |
| 758 | Brain           | head development                         | GO:0060322          | $2.84 \times 10^{-12}$ | $3.78 \times 10^{-09}$ |
| 759 | Brain           | Neurogenesis                             | GO:0022008          | $3.22 \times 10^{-12}$ | $3.78 \times 10^{-09}$ |
| 760 | Brain           | brain development                        | GO:0007420          | $4.98 \times 10^{-12}$ | $4.67 \times 10^{-09}$ |
| 761 | Pancreas        | response to endoplasmic reticulum stress | GO:0034976          | $2.14 \times 10^{-11}$ | $1.51 \times 10^{-07}$ |
| 762 | Pancreas        | oxoacid metabolic process                | GO:0043436          | $1.58 \times 10^{-10}$ | $4.04 \times 10^{-07}$ |
| 763 | Pancreas        | organic acid metabolic process           | GO:0006082          | $1.72 \times 10^{-10}$ | $4.04 \times 10^{-07}$ |
| 764 | Pancreas        | response to endogenous stimulus          | GO:0009719          | $6.34 \times 10^{-09}$ | $1.12 \times 10^{-05}$ |
| 765 | Pancreas        | carboxylic acid metabolic process        | GO:0019752          | $2.29 \times 10^{-08}$ | $3.24 \times 10^{-05}$ |
| 766 | Skeletal Muscle | actin filament-based process             | GO:0030029          | $1.26 \times 10^{-09}$ | $5.78 \times 10^{-06}$ |
| 767 | Skeletal Muscle | actin cytoskeleton organization          | GO:0030036          | $5.04 \times 10^{-09}$ | $1.16 \times 10^{-05}$ |
| 768 | Skeletal Muscle | cytoskeleton organization                | GO:0007010          | $1.50 \times 10^{-08}$ | $2.30 \times 10^{-05}$ |
| 769 | Skeletal Muscle | cellular carbohydrate metabolic process  | GO:0044262          | $2.19 \times 10^{-08}$ | $2.52 \times 10^{-05}$ |
| 770 | Skeletal Muscle | embryonic morphogenesis                  | GO:0048598          | $2.37 \times 10^{-07}$ | $2.17 \times 10^{-04}$ |
| 771 | Lung and Kidney | embryonic skeletal system morphogenesis  | GO:0048704          | $1.50 \times 10^{-10}$ | $3.52 \times 10^{-07}$ |
| 772 | Lung and Kidney | embryonic organ morphogenesis            | GO:0048562          | $1.61 \times 10^{-10}$ | $3.52 \times 10^{-07}$ |
| 773 | Lung and Kidney | embryonic skeletal system development    | GO:0048706          | $5.24 \times 10^{-10}$ | $7.65 \times 10^{-07}$ |
| 774 | Lung and Kidney | embryonic organ development              | GO:0048568          | $1.13 \times 10^{-08}$ | $1.23 \times 10^{-05}$ |
| 775 | Lung and Kidney | pattern specification process            | GO:0007389          | $3.31 \times 10^{-08}$ | $2.90 \times 10^{-05}$ |

776

777

778 Gene ontology (GO) terms are presented for the top five most significantly enriched results of each tissue after correcting for multiple  
 779 testing (FDR < 0.05). As the numbers of tissue specific DMRs for lung (n=22) and kidney (n=119) samples were so few, the  
 780 corresponding gene sets were combined for this analysis.

781

782

783 **Table 2.** Correlation analysis of mean promoter and gene body DNA methylation and ranked gene expression.  
 784

| Tissue | Genomic Region | Gene Count | Rho (p-value)                      |
|--------|----------------|------------|------------------------------------|
| Brain  | Promoter       | 5,396      | -0.08 (p = 2.28×10 <sup>-9</sup> ) |
|        | Gene body      | 5,443      | -0.16 (p < 2.2×10 <sup>-16</sup> ) |
| Kidney | Promoter       | 9,268      | -0.12 (p < 2.2×10 <sup>-16</sup> ) |
|        | Gene body      | 9,379      | -0.12 (p < 2.2×10 <sup>-16</sup> ) |
| Lung   | Promoter       | 9,192      | -0.13 (p < 2.2×10 <sup>-16</sup> ) |
|        | Gene body      | 9,265      | -0.19 (p < 2.2×10 <sup>-16</sup> ) |

785 Spearman's rank correlation coefficients ( $\rho$ ) and associated significances are reported for all tissues with both whole genome bisulfite  
 786 sequencing (WGBS) data and RNA-seq expression data.  
 787  
 788

789  
 790  
 791  
 792 **Table 3.** Sex-based differential expression of the *lncRNA Rsx* utilizing different data subsets and expression quantification tools.  
 793

| Expression Dataset   | Tool   | Female Count | Male Count | Significance                     |
|----------------------|--------|--------------|------------|----------------------------------|
| All Data (n = 15)    | DeSeq2 | 6987.1       | 16         | p-value = 0.05                   |
| Matched Data (n = 6) | DeSeq2 | 6837.6       | 0          | p-value = 2.04×10 <sup>-30</sup> |
| Matched Data (n = 6) | NOISeq | 7872.4       | 0.67       | Probability = 99.99%             |
| Kidney Data (n = 2)  | NOISeq | 4074.4       | 0.68       | Probability = 99.99%             |

794 Normalized expression count values and significance of sex-based differential expression is shown for three data subsets using two  
 795 expression quantification tools. All data refers to the dataset considering all 15 RNA-seq samples (7 male and 8 female). Matched data  
 796 includes the tissues with both male and female RNA-seq samples (brain, kidney, and lung), and the kidney data is reported  
 797 independently. DeSeq2 reports significance as an associated p-value from the Wald test while NOISeq reports a probability of  
 798 differential expression threshold.  
 799

800  
 801  
 802  
 803

804 **Figures**

805

806 **Figure 1.**

807

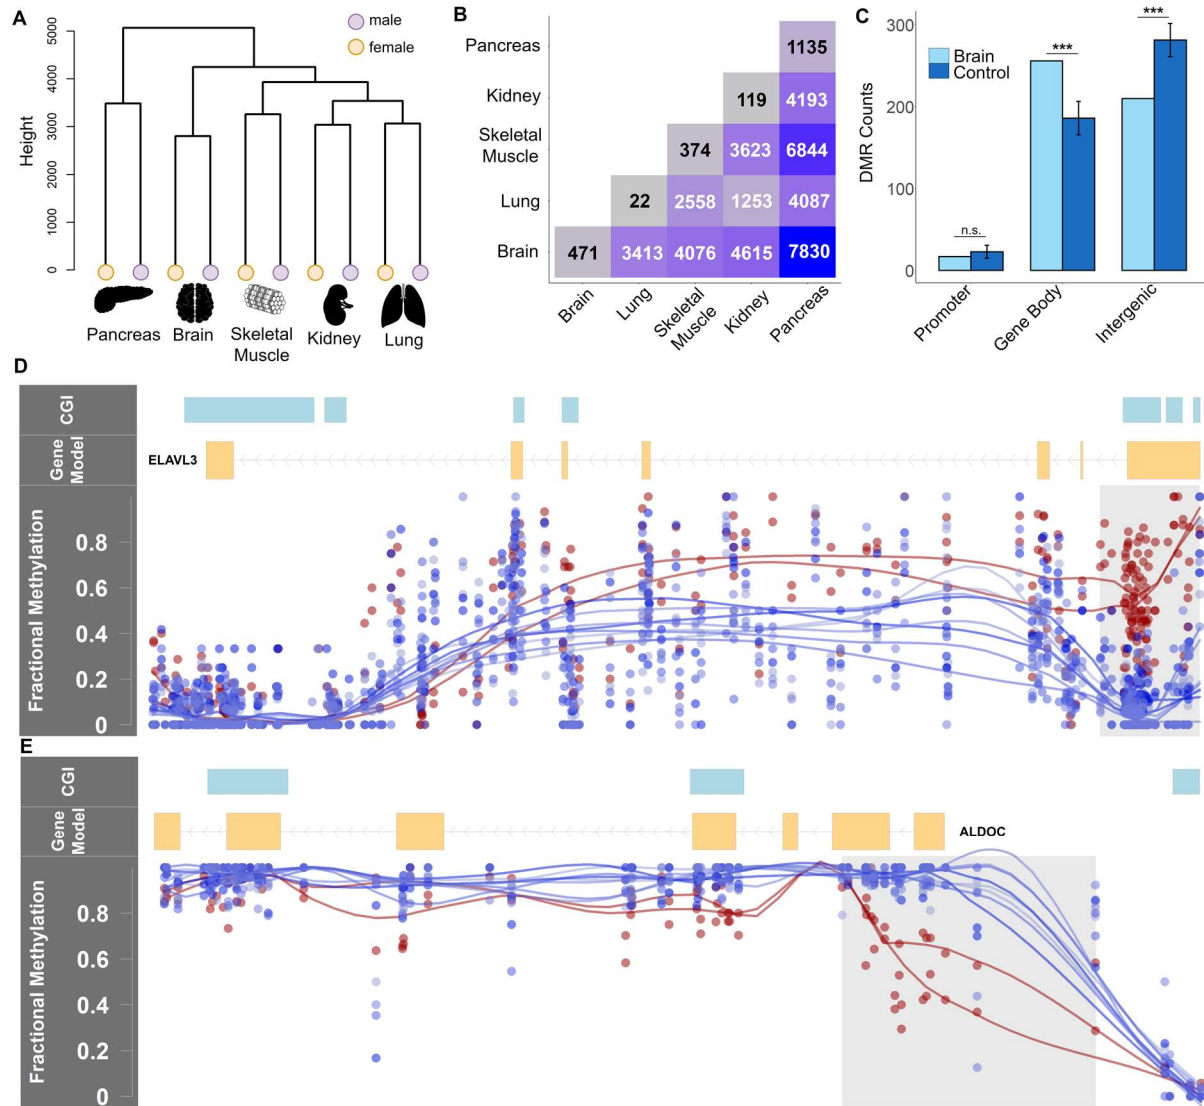

808

809

810

811

812

813

814

815

816

817

818

819

820

821 **Figure 2.**  
822

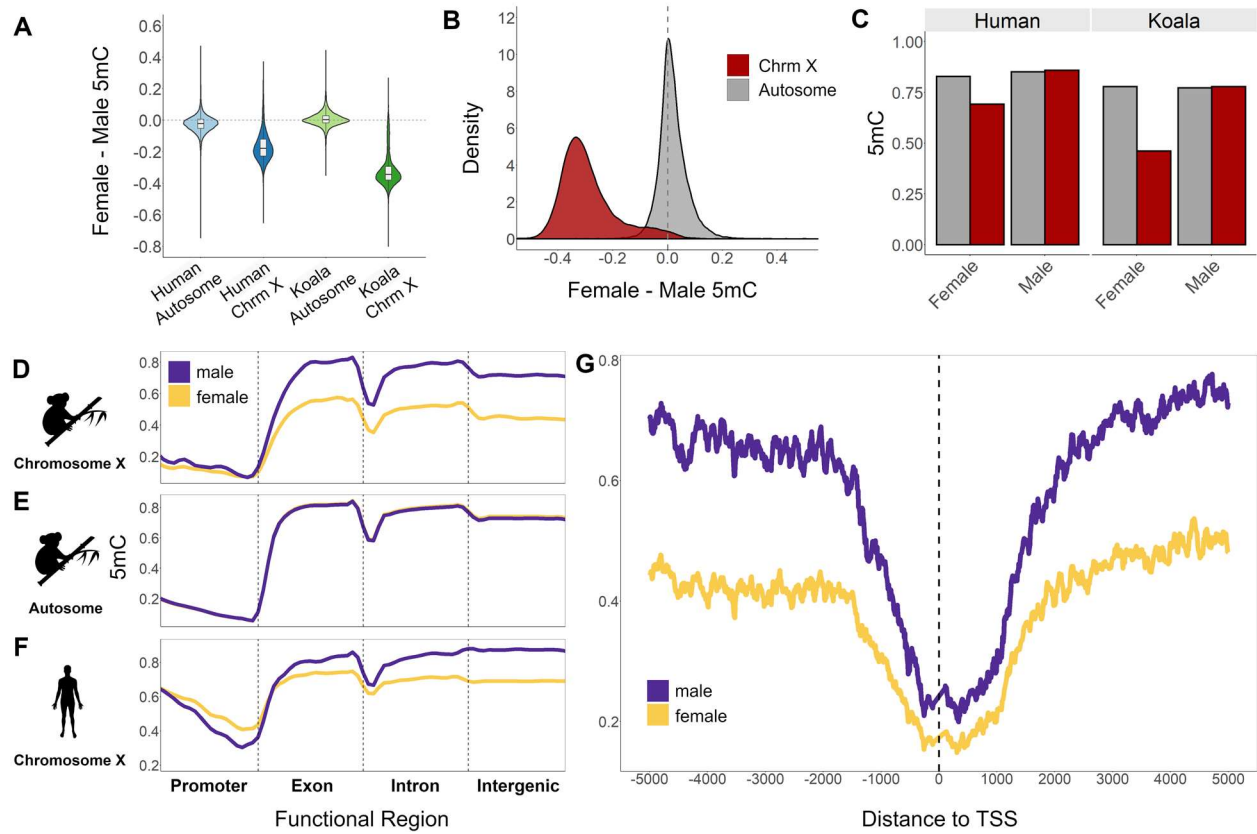

823  
824  
825  
826

827 **Figure 3.**

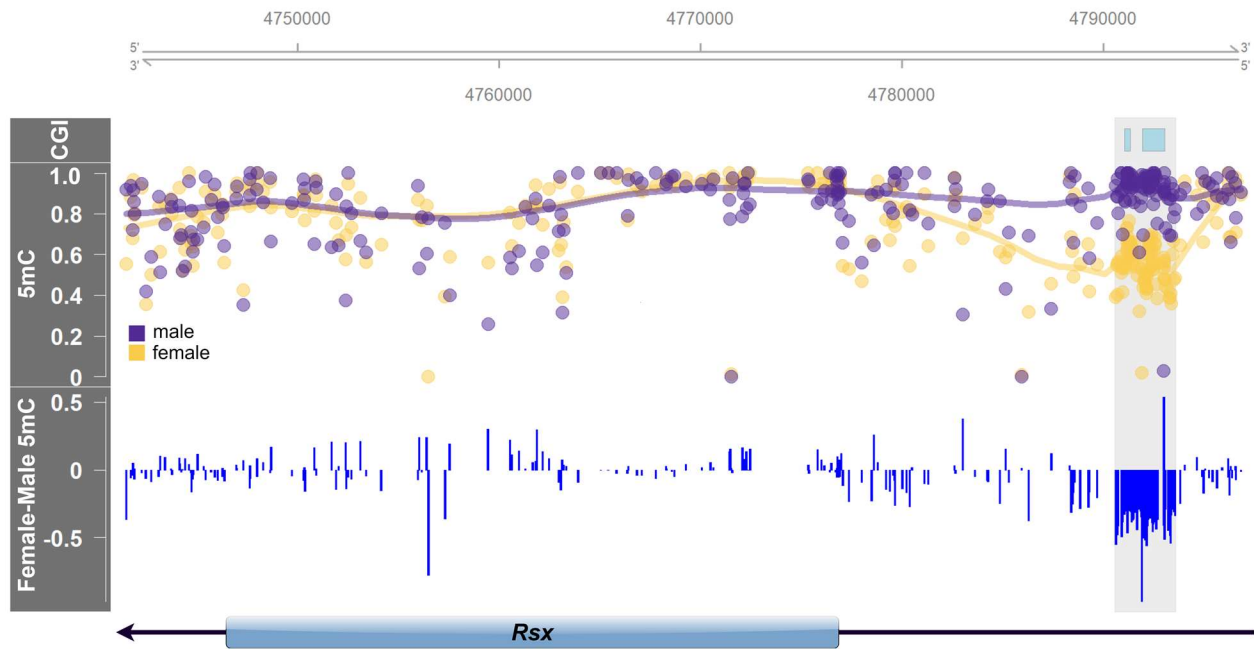

828  
829

Figure 4.

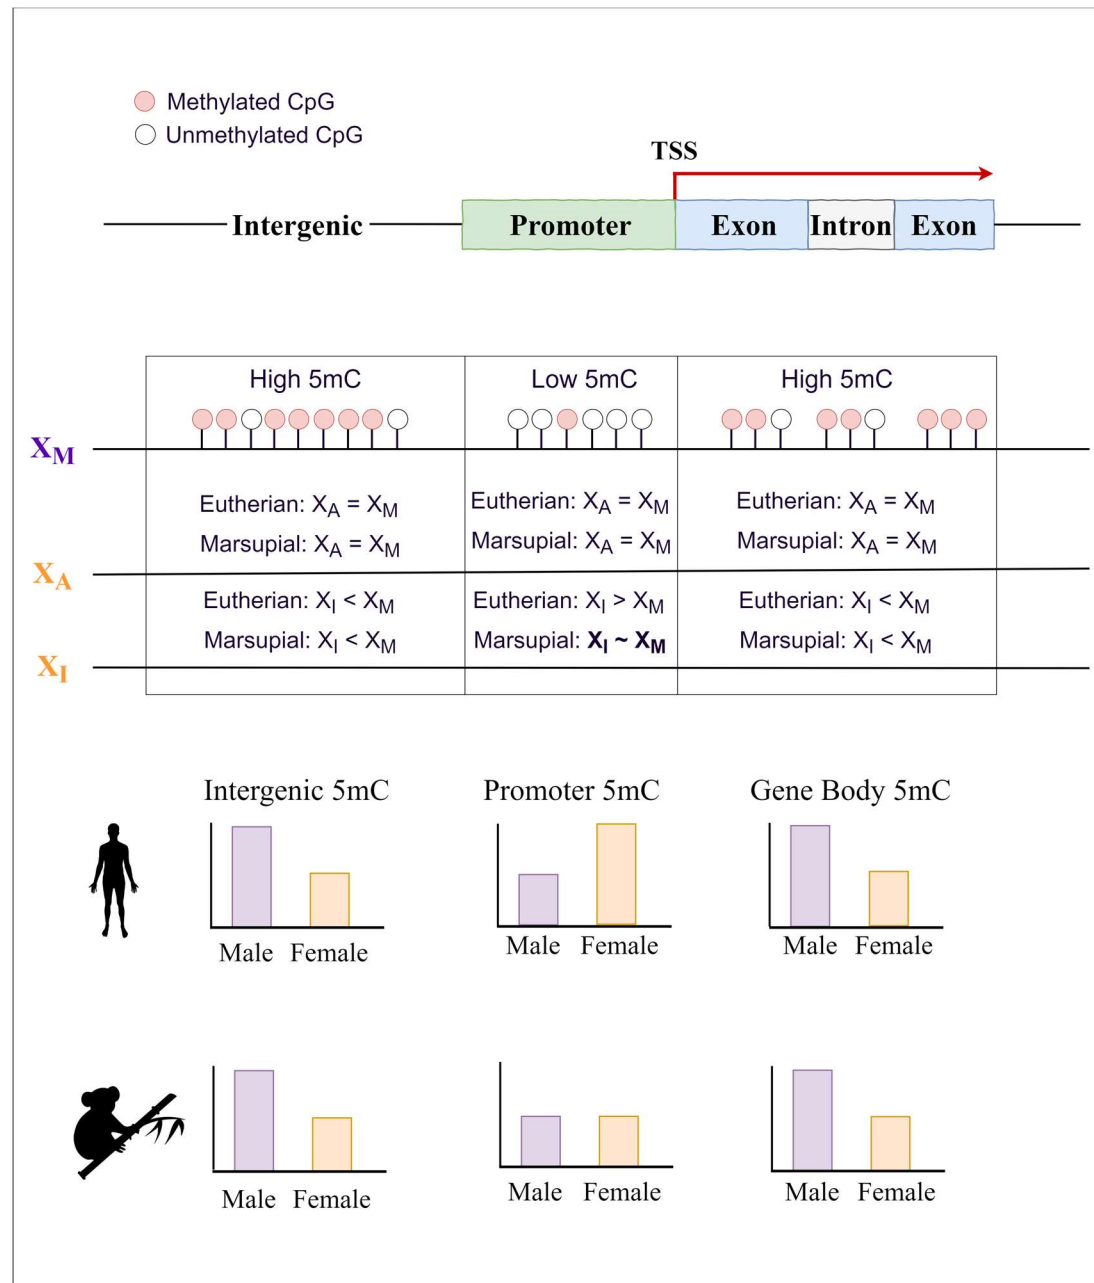

## Supplementary Tables

**Supplementary Table 1.** Overview of whole genome bisulfite sequencing (WGBS) data for all 10 koala samples.

| Sample        | Australian Museum registration | Name              | Tissue          | Mapped Reads | De-duplicated Reads | Total CpGs | Coverage (%) | Mean Depth | % Reads Cov > 3× | Bisulfite Conversion Rate |
|---------------|--------------------------------|-------------------|-----------------|--------------|---------------------|------------|--------------|------------|------------------|---------------------------|
| WGM145_01_S1  | M.45022                        | Pacific Chocolate | Brain           | 602055711    | 228244836           | 16761785   | 97.5         | 13.99      | 93.4             | 98.2                      |
| WGM145_04_S2  | M.47723                        | Ben               | Brain           | 677593548    | 233893124           | 16761785   | 97.6         | 14.61      | 93.8             | 98.0                      |
| WGM145_06_S3  | M.45022                        | Pacific Chocolate | Kidney          | 559911229    | 213274030           | 16761785   | 97.2         | 13.62      | 92.5             | 98.7                      |
| WGM145_08_S4  | M.47723                        | Ben               | Kidney          | 589121434    | 202094771           | 16761785   | 97.2         | 12.93      | 92.3             | 98.7                      |
| WGM145_09_S5  | M.45022                        | Pacific Chocolate | Lung            | 637878987    | 210002505           | 16761785   | 97.5         | 13.8       | 93.2             | 98.6                      |
| WGM145_12_S6  | M.47723                        | Ben               | Lung            | 663204935    | 198555030           | 16761785   | 97.3         | 12.54      | 92.4             | 98.6                      |
| WGM145_14_S7  | M.45022                        | Pacific Chocolate | Skeletal Muscle | 592423486    | 168450992           | 16761785   | 96.7         | 10.93      | 90.0             | 98.7                      |
| WGM145_16_S8  | M.47723                        | Ben               | Skeletal Muscle | 605979530    | 168220022           | 16761785   | 96.8         | 11.12      | 90.4             | 98.6                      |
| WGM145_19_S9  | M.45022                        | Pacific Chocolate | Pancreas        | 563288200    | 159866998           | 16761785   | 96.2         | 9.857      | 88.0             | 98.6                      |
| WGM145_20_S10 | M.47723                        | Ben               | Pancreas        | 598508860    | 166573663           | 16761785   | 96.6         | 10.56      | 89.4             | 98.7                      |

**Supplementary Table 2.** GC-content for all scaffolds linked to annotated autosomes (chromosomes 1-7) and the X chromosome.

| Chromosome | Size (Mb) | Total GC Content (%) |
|------------|-----------|----------------------|
| 1          | 730.67    | 38.72                |
| 2          | 595.75    | 38.58                |
| 3          | 480.35    | 39.35                |
| 4          | 412.55    | 39.38                |
| 5          | 299.29    | 39.56                |
| 6          | 248.35    | 38.66                |
| 7          | 250.28    | 39.20                |
| X          | 67.91     | 42.02                |

**Supplementary Table 3.** Enrichment and significance of all tissue specific DMRs compared to length and GC matched control regions.

| Tissue          | Genomic Region | DMR Counts (%) | Enrichment | p-value         |
|-----------------|----------------|----------------|------------|-----------------|
| Pancreas        | Promoter       | 52 (4.5%)      | 1.13       | 0.74            |
|                 | Gene body      | 612 (52.5 %)   | 1.44       | < <b>0.0001</b> |
|                 | Intergenic     | 502 (43.0 %)   | -1.40      | < <b>0.0001</b> |
| Brain           | Promoter       | 17 (3.5%)      | -1.35      | 0.25            |
|                 | Gene body      | 256 (53.0 %)   | 1.38       | < <b>0.0001</b> |
|                 | Intergenic     | 210 (43.5%)    | -1.34      | < <b>0.0001</b> |
| Skeletal Muscle | Promoter       | 19 (4.9 %)     | -1.23      | 0.32            |
|                 | Gene body      | 202 (51.8 %)   | 1.27       | < <b>0.0001</b> |
|                 | Intergenic     | 169 (43.3 %)   | -1.26      | <b>0.001</b>    |
| Kidney          | Promoter       | 5 (4.0 %)      | -1.34      | 0.40            |
|                 | Gene body      | 62 (50.0 %)    | 1.25       | < <b>0.0001</b> |
|                 | Intergenic     | 57 (46.0%)     | -1.21      | <b>0.04</b>     |
| Lung            | Promoter       | 1 (4.3 %)      | -1.61      | 0.51            |
|                 | Gene body      | 12 (52.2%)     | 1.37       | < <b>0.0001</b> |
|                 | Intergenic     | 10 (43.5%)     | -1.31      | 0.14            |

Reported are the total counts of tissue specific differentially methylated regions (DMRs) falling within one of three annotated genomic regions: promoters, gene bodies, and intergenic regions. The enrichment of DMRs in each functional region is shown through a fold change comparison with a control dataset generated from 10,000 bootstraps using length and GC matched control regions. All significant p-values ( $p < 0.05$ ) are highlighted in bold.



**Supplementary Table 4.** Mean and median sex-based DNA methylation difference calculated for all candidate X-scaffolds (n=98) by tissue.

| <b>Tissue</b>    | <b>Median Male-Female 5mC</b> | <b>Mean Male-Female 5mC</b> |
|------------------|-------------------------------|-----------------------------|
| Pancreas         | -0.2282 ± 0.15                | -0.2066 ± 0.12              |
| Brain            | -0.3273 ± 0.14                | -0.2911 ± 0.12              |
| Skeletal Muscle  | -0.2748 ± 0.15                | -0.2431 ± 0.12              |
| Kidney           | -0.2850 ± 0.15                | -0.2567 ± 0.12              |
| Lung             | -0.2706 ± 0.14                | -0.2437 ± 0.11              |
| Combined Tissues | -0.2773 ± 0.15                | -0.2484 ± 0.12              |

The female and male mean fractional DNA methylation (methylated reads/total reads per CpG) was calculated for all CpGs within 10 kb bins across candidate scaffold.

## Supplementary Figures

### Supplementary Figure 1. Enrichment of tissue specific differentially methylated regions (DMRs) falling within genomic functional regions.

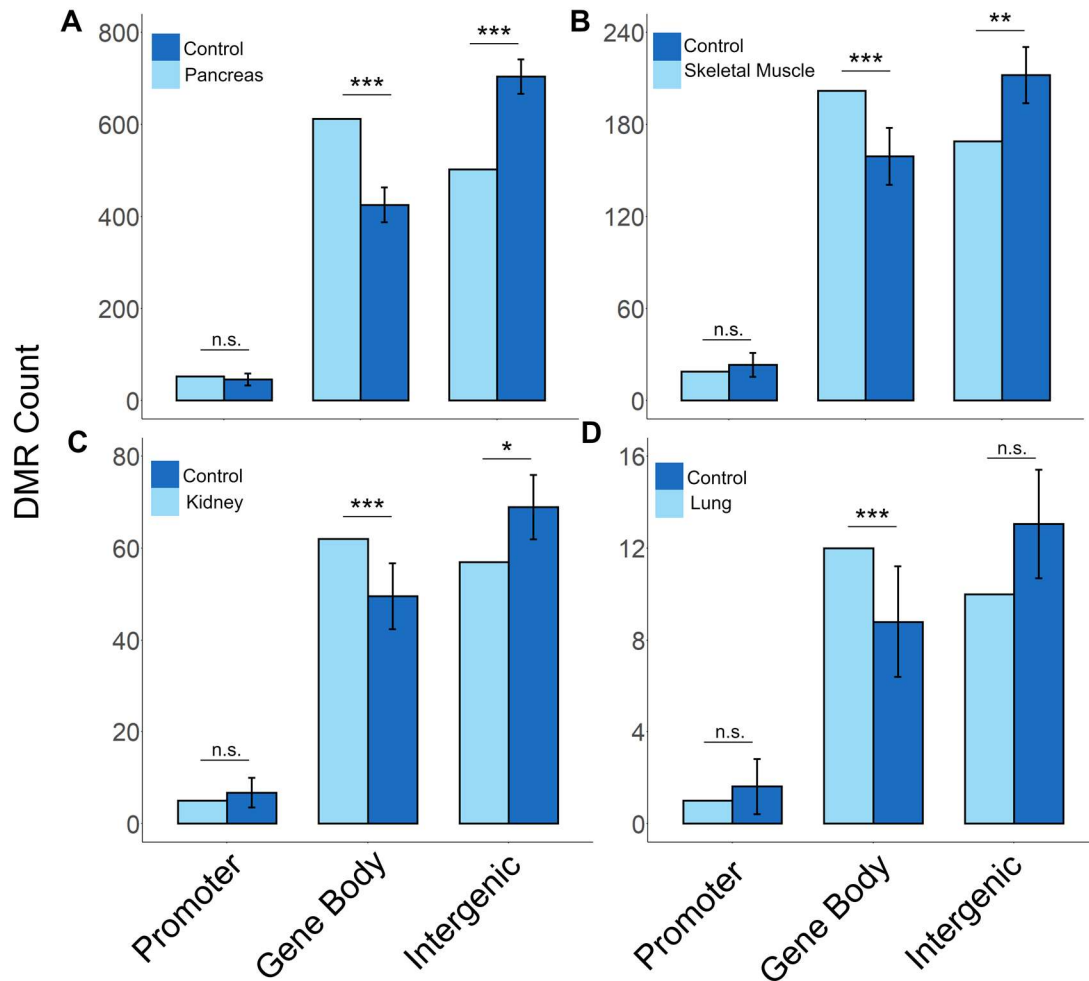

Data shown for (A) pancreas, (B) skeletal muscle, (C) kidney, and (D) lung. The enrichment of DMRs in each functional region (promoter, gene body, and intergenic regions) is shown through a comparison with length and GC matched control regions (\*\*\*) indicates  $p < 0.0001$ , \*\* indicates  $p < 0.001$ , \* indicates  $p < 0.05$ , and non-significance is shown by n.s. based on 10,000 bootstraps). Error bars indicate standard deviation.

**Supplementary Figure 2.** Correlation of gene expression and DNA methylation (5mC) in CpGs across promoters and gene bodies.

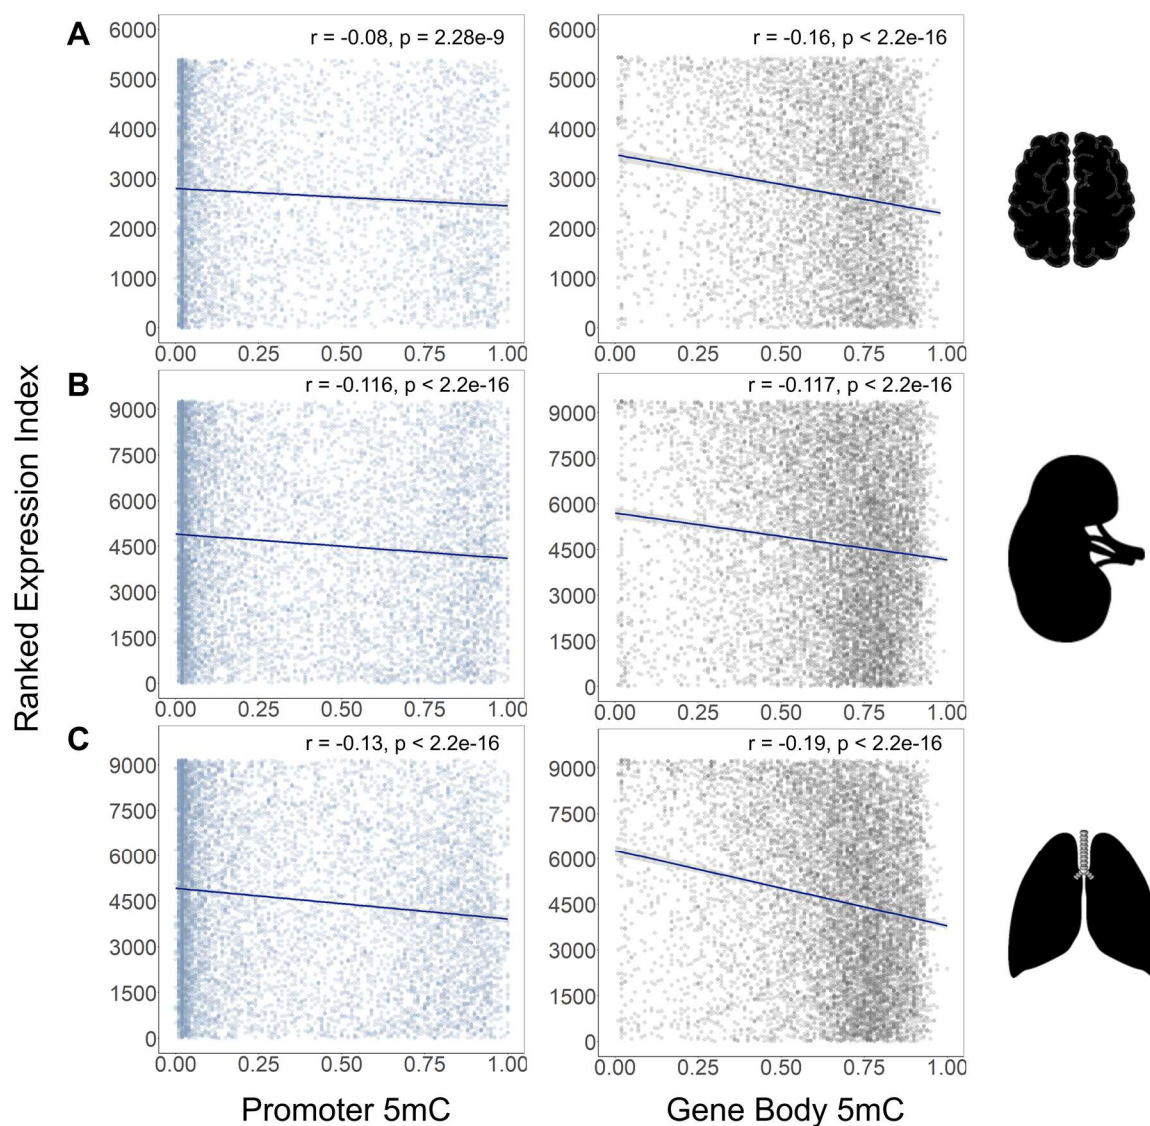

Three tissues with both whole genome bisulfite sequencing (WGBS) DNA methylation data and RNA-seq gene expression data are shown, (A) brain ( $n = 5,396$  promoters and  $n = 5,443$  gene bodies), (B) kidney ( $n = 9,268$  promoters and  $n = 9,379$  gene bodies), and (C) lung ( $n = 9,192$  promoters and  $n = 9,265$  gene bodies). For A-C, TPM expression values were ranked from low to high for each gene and correlated with mean fractional DNA methylation (methylated reads/total reads per CpG site). Spearman's rank correlation coefficients and the associated p-values are reported.

**Supplementary Figure 3.** Correlation of tissue dependent DNA methylation (5mC) and gene expression from brain and kidney samples.

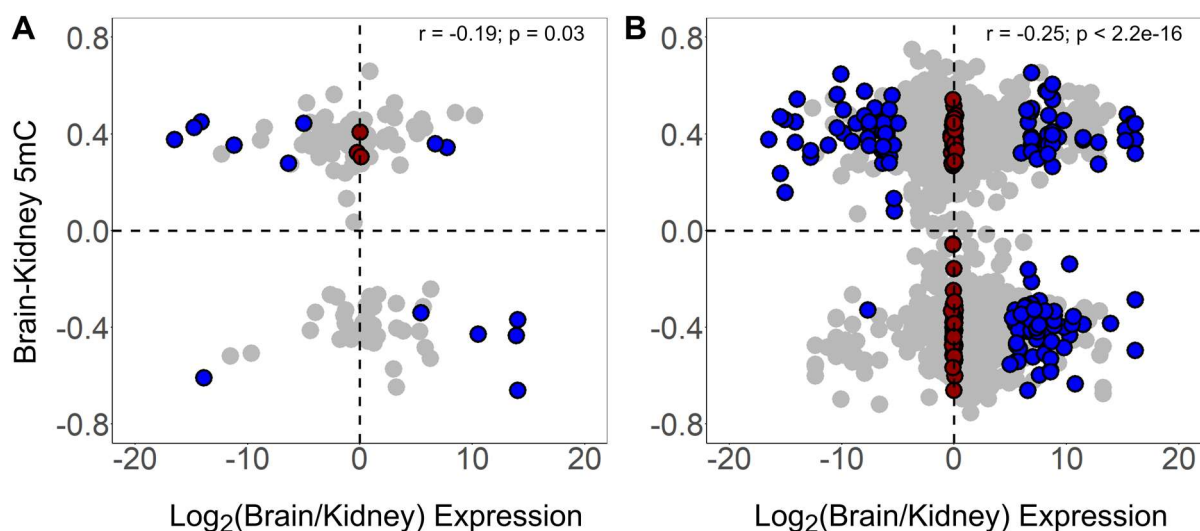

(A) The mean brain and kidney DNA methylation difference calculated for all CpGs across each gene promoter matched with the corresponding log-transformed ratio of brain to kidney expression. (B) The mean brain and kidney DNA methylation difference calculated for all CpGs across each gene body and matched with corresponding log-transformed ratio of brain to kidney expression. For A and B, Spearman's rank correlation coefficient and the associated p-value is reported. Blue dots indicate genes that are significantly differentially express between brain and kidney samples (probability of differential expression  $> 95\%$  based on NOISEq) and red dots show all genes that are significantly similarly methylated in brain and kidney samples (probability of differential expression  $< 5\%$  based on NOISEq).

### Supplementary Figure 4. Sex-specific CpG depth of coverage and read mapping to autosomes and X chromosomes.

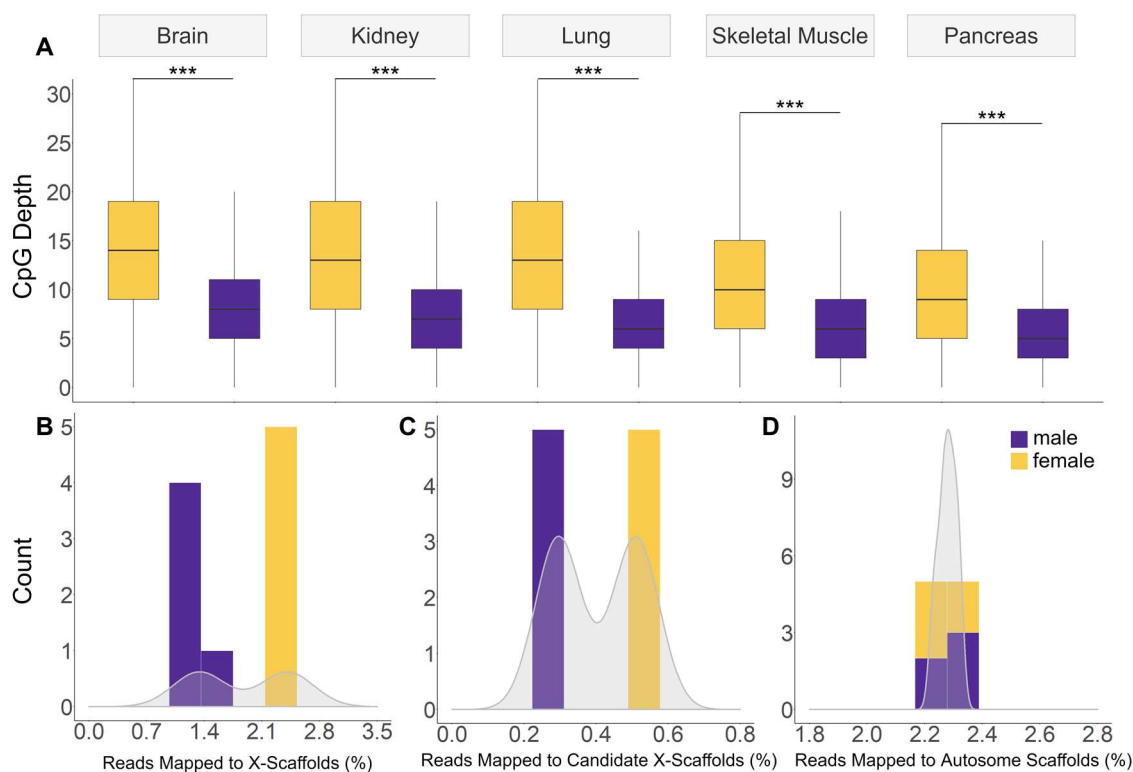

(A) For each of the five tissues, box-and-whisker plots of CpG depths across the X chromosome in male (purple) and female (orange) samples (\*\*\*) indicates  $p < 2.2 \times 10^{-16}$ , Mann-Whitney U test). Histogram and distribution of sex-based read mapping per sample (n=10) to (B) X-linked scaffolds, (C) candidate X-linked scaffolds, and (D) a subset of autosome-linked scaffolds matched in length with all known X-linked scaffolds. For A-C, the percent of reads mapping to the scaffold category of interest over the total number of mapped reads in the genome was calculated for all male (n=5) and female samples (n=5). The known X-linked and candidate X-linked scaffolds show a bimodal distribution with an increase of read mapping to female samples expected from the 2:1 ratio X chromosomes in females to males. This bimodality is not observed in autosomes.

**Supplementary Figure 5.** The distribution of sex-based CpG fractional DNA methylation (5mC) differences across autosomes and X chromosomes.

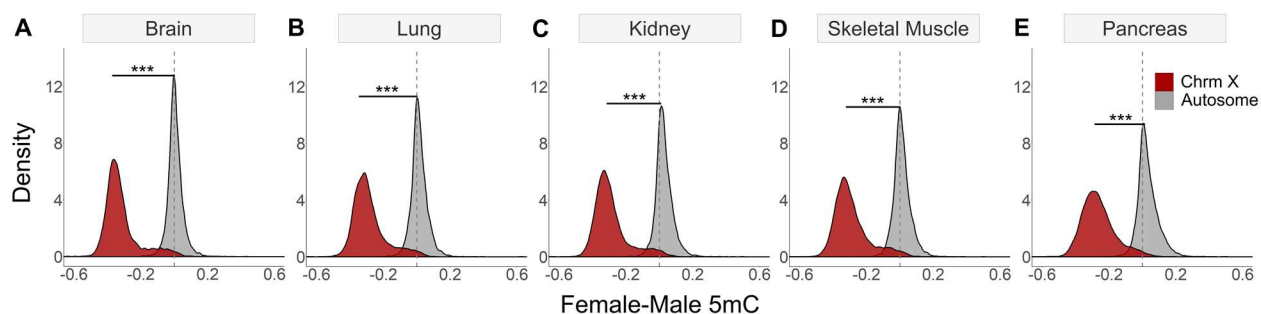

The distribution of female and male mean fractional methylation difference from (A) brain, (B) lung, (C) kidney, (D) skeletal muscle and (E) pancreas samples across autosomes and X chromosomes. For A-E, the female and male mean fractional methylation (methylated reads/total reads per CpG) was calculated for all CpGs within 10 kb bins across each autosome- or X-linked scaffold. All tissues exhibited a significant shift towards female hypomethylation in the X chromosome compared to the autosome (\*\*\*) indicates  $p < 2.2 \times 10^{-16}$ , Welch's t-t

**Supplementary Figure 6.** Female and male gene expression across autosomes and the X chromosome using kidney RNA-seq data.

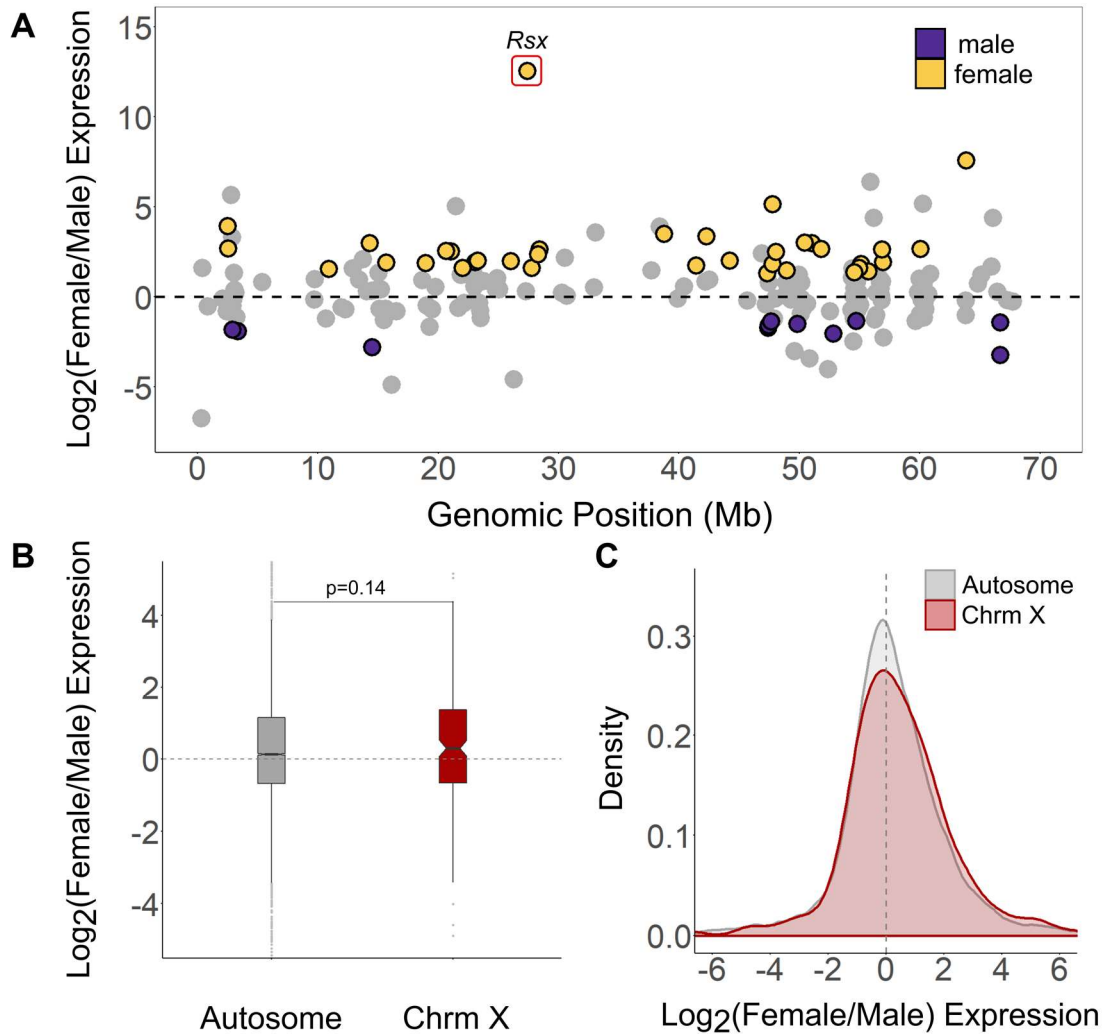

(A) The relative genomic location of all genes linked to X chromosome scaffolds aligned by scaffold length and the log-transformed female to male expression ratio generated by NOISeq. Orange dots indicate the 36 genes with significant female-biased expression and purple dots indicate the 11 genes with significant male-biased expression (probability of differential expression > 95% based on NOISeq). For all autosome-linked genes ( $n = 10,414$ ) and chromosome X-linked genes ( $n = 209$ ), a box-and-whisker plot (B) and density distribution (C) of the log-transformed female to male expression ratio ( $p = 0.14$ , Mann-Whitney U test).

**Supplementary Figure 7.** Correlation analysis of sex-based DNA methylation (5mC) and gene expression across chromosome X using kidney WGBS and RNA-seq data.

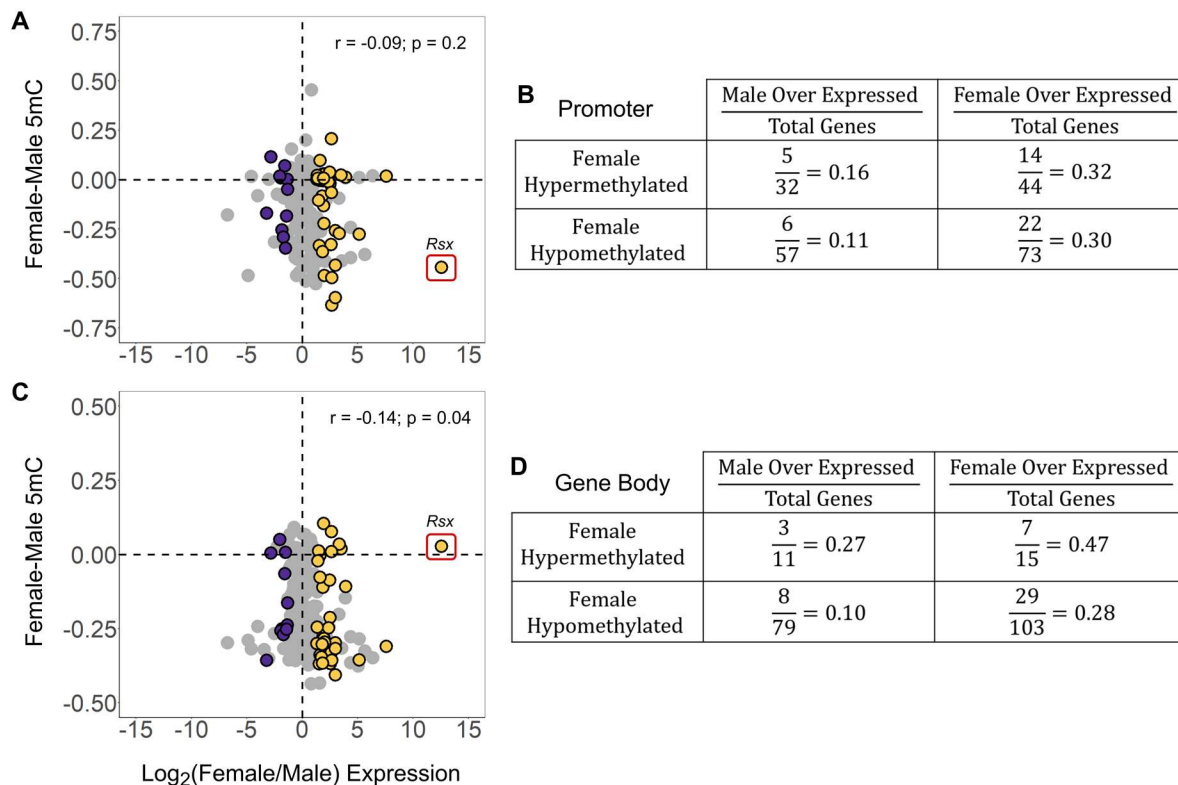

(A) The mean female and male fractional methylation difference calculated for all CpGs across each gene promoter matched with the corresponding log-transformed ratio of female to male expression. (B) The ratio of the number female hypermethylated and female hypomethylated gene promoters that show either significant male or female biased expression over the total number of genes in each category. (C) The mean female and male fractional methylation difference calculated for all CpGs across each gene body and matched with corresponding log-transformed ratio of female to male expression. (D) The ratio of the number female hypermethylated and female hypomethylated gene bodies that show either significant male or female biased expression over the total number of genes in each category. For A and C, Spearman's rank correlation coefficient and the associated p-value is reported. The *Rsx* gene was excluded from the correlation calculation. Orange dots indicate the 36 genes with significant female-biased expression and purple dots indicate the 11 genes with significant male-biased expression (probability of differential expression > 95% based on NOISEq).



**Supplementary Figure 7.** Sex-based DNA methylation (5mC) by GC-content across autosomes and the X chromosome.

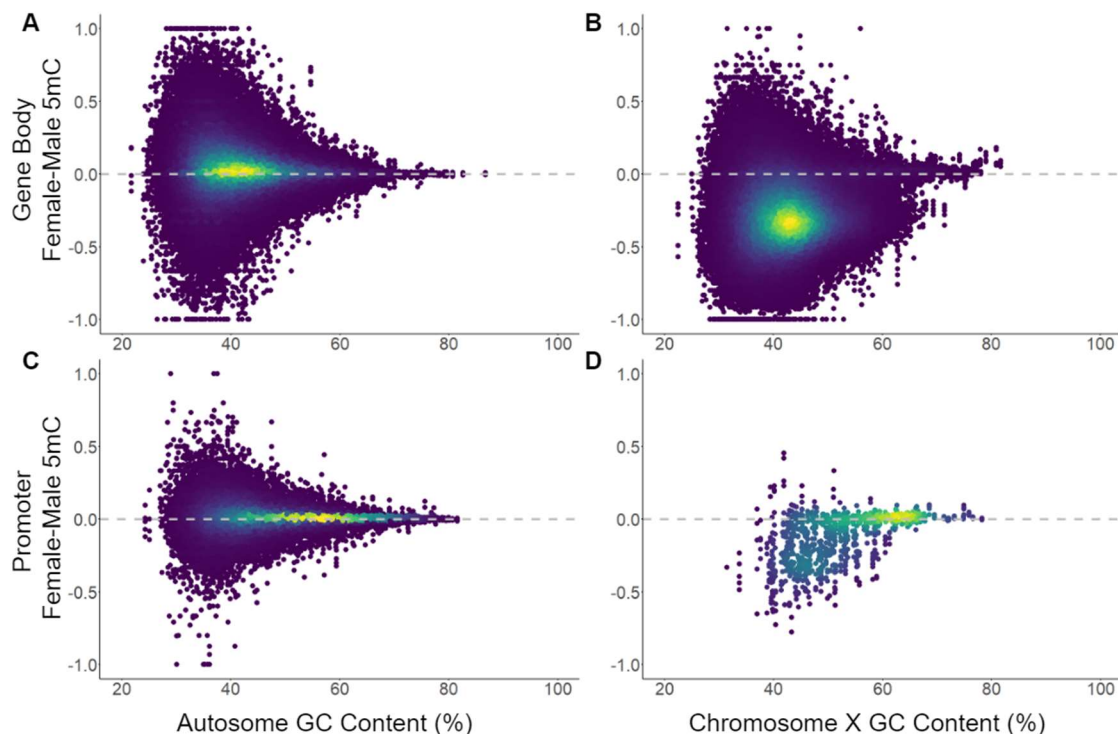

For A and B, the mean female and male methylation difference calculated from CpGs in 1 Kb bins across (A) autosomes and (B) X chromosomes. For C and D, mean female and male methylation difference calculated from CpGs located in promoter regions (defined as regions 1 kb upstream of known gene TSSs) in (C) autosomes and (B) X chromosomes. For A-D, data from all five tissues (brain, kidney, lung, pancreas, and skeletal muscle) are reported. All plots are coloured by data density where blue represents low density regions and yellow represents high density regions.
